# Supplementary material
Source: PubMed Central journal article supplement (PMC3541433)
Supplement: NIHMS393605-supplement-1.pdf [file NIHMS393605-supplement-1.pdf]

## Supplemental Table S1: Periderm-enriched profile

\*\*\* Filters are expression in GFP+ or GFP- is greater than 300, and expression in GFP+ is at least 3 fold higher than expression in GFP-

\*\*\*Items in BOLD match the GO term, " regulation of transcription, DNA-dependent"

| ENSEMBL_TRANSCRIPT_Name |                                                                                                                | Expression in GFP+ cells | Expression in GFP- cells |
|-------------------------|----------------------------------------------------------------------------------------------------------------|--------------------------|--------------------------|
| ENSDART00000008373      | FOS-like antigen 1                                                                                             | 23,568                   | 7,574                    |
| ENSDART00000052521      | nuclear factor of activated T-cells, cytoplasmic, calcineurin-dependent 1                                      | 18,604                   | 358                      |
| ENSDART00000048293      | interferon regulatory factor 11                                                                                | 15,287                   | 3,778                    |
| ENSDART00000059435      | transcription factor AP-2 gamma (activating enhancer binding protein 2 gamma)                                  | 9,394                    | 2,575                    |
| ENSDART00000025153      | hypothetical protein LOC100151105; GATA-binding protein 3                                                      | 6,539                    | 1,286                    |
| ENSDART00000110297      | Kruppel like factor 4 (Klf4)                                                                                   | 3,706                    | 78                       |
| ENSDART00000008176      | ventral homeobox                                                                                               | 2,325                    | 716                      |
| ENSDART00000058036      | empty spiracles homeobox 2                                                                                     | 1,708                    | 524                      |
| ENSDART00000059976      | chicken ovalbumin upstream promoter transcription factor 5; nuclear receptor subfamily 2, group F, mem         | 1,444                    | 452                      |
| ENSDART00000087250      | CREB binding protein a                                                                                         | 1,358                    | 448                      |
| ENSDART00000065137      | tumor protein p63                                                                                              | 1,241                    | 294                      |
| ENSDART00000000160      | thyroid hormone receptor alpha b; thyroid hormone receptor alpha a                                             | 1,205                    | 245                      |
| ENSDART00000028618      | MAD homolog 9 (Drosophila)                                                                                     | 1,152                    | 145                      |
| ENSDART00000008920      | zgc:63565                                                                                                      | 1,132                    | 168                      |
| ENSDART00000076035      | serum response factor                                                                                          | 1,070                    | 271                      |
| ENSDART00000082425      | GATA-binding protein 2a                                                                                        | 973                      | 303                      |
| ENSDART00000019059      | si:ch211-260g14.3                                                                                              | 920                      | 82                       |
| ENSDART00000040769      | chicken ovalbumin upstream promoter transcription factor 4; nuclear receptor subfamily 2, group F, mem         | 898                      | 210                      |
| ENSDART00000049887      | v-maf musculoaponeurotic fibrosarcoma oncogene homolog K (avian)                                               | 872                      | 73                       |
| ENSDART00000100120      | SMAD family member 6a                                                                                          | 845                      | 40                       |
| ENSDART00000082475      | nuclear receptor subfamily 1, group D, member 4b                                                               | 793                      | 215                      |
| ENSDART00000079644      | tumor protein p73                                                                                              | 769                      | 194                      |
| ENSDART00000064274      | hypothetical LOC100001075; zgc:172075                                                                          | 759                      | 32                       |
| ENSDART00000013563      | activating transcription factor 7a                                                                             | 753                      | 131                      |
| ENSDART00000033362      | si:dkeyp-66g8.1                                                                                                | 709                      | 180                      |
| ENSDART00000110621      | nuclear receptor coactivator 3                                                                                 | 707                      | 182                      |
| ENSDART00000030773      | forkhead box O3A                                                                                               | 697                      | 168                      |
| ENSDART00000010813      | forkhead box A3                                                                                                | 665                      | 124                      |
| ENSDART00000012116      | T-cell leukemia, homeobox 2                                                                                    | 664                      | 128                      |
| ENSDART00000052570      | paired-like homeodomain transcription factor 2                                                                 | 567                      | 174                      |
| ENSDART000000114762     | zgc:193933                                                                                                     | 540                      | 104                      |
| ENSDART00000059638      | signal transducer and activator of transcription 1b                                                            | 536                      | 43                       |
| ENSDART00000099134      | myocyte enhancer factor 2ca                                                                                    | 526                      | 146                      |
| ENSDART00000077004      | paired box gene 2a; paired box gene 5                                                                          | 519                      | 128                      |
| ENSDART00000013148      | POU domain gene 50                                                                                             | 516                      | 169                      |
| ENSDART00000090235      | zgc:136878                                                                                                     | 512                      | 111                      |
| ENSDART00000064616      | neural retina leucine zipper                                                                                   | 496                      | 132                      |
| ENSDART00000105394      | runt-related transcription factor 2a                                                                           | 474                      | 107                      |
| ENSDART00000102070      | zgc:153914; similar to Cyclic AMP-dependent transcription factor ATF-6 beta (Activating transcription fac      | 473                      | 125                      |
| ENSDART00000088876      | AT-rich sequence binding protein 2                                                                             | 469                      | 144                      |
| ENSDART00000012658      | ets variant gene 1                                                                                             | 465                      | 72                       |
| ENSDART00000045374      | MAD homolog 3a (Drosophila)                                                                                    | 462                      | 143                      |
| ENSDART00000077721      | interferon regulatory factor 4b                                                                                | 460                      | 73                       |
| ENSDART00000078064      | sine oculis homeobox homolog 9                                                                                 | 452                      | 135                      |
| ENSDART00000098259      | aryl hydrocarbon receptor nuclear translocator-like 1b                                                         | 452                      | 149                      |
| ENSDART00000049339      | SRY-box containing gene 21a                                                                                    | 450                      | 118                      |
| ENSDART00000075936      | paired box gene 9                                                                                              | 447                      | 115                      |
| ENSDART00000008816      | orthodenticle homolog 2                                                                                        | 435                      | 123                      |
| ENSDART00000020616      | zgc:194189                                                                                                     | 434                      | 138                      |
| ENSDART00000026567      | forkhead box N1                                                                                                | 404                      | 103                      |
| ENSDART00000044397      | si:dkey-260n20.1                                                                                               | 401                      | 89                       |
| ENSDART00000013642      | zgc:85969                                                                                                      | 391                      | 82                       |
| ENSDART00000029939      | regulatory factor X, 2 (influences HLA class II expression)                                                    | 380                      | 81                       |
| ENSDART00000011597      | nuclear receptor subfamily 2, group C, member 2                                                                | 374                      | 51                       |
| ENSDART00000097650      | spleen focus forming virus (SFFV) proviral integration oncogene spi1 like; hypothetical LOC792271              | 369                      | 121                      |
| ENSDART00000061122      | si:dkeyp-93d12.2                                                                                               | 369                      | 73                       |
| ENSDART00000060861      | forkhead box P2                                                                                                | 347                      | 116                      |
| ENSDART00000052101      | zgc:91944                                                                                                      | 345                      | 80                       |
| ENSDART00000024898      | transcription factor AP-2 beta                                                                                 | 344                      | 54                       |
| ENSDART00000021159      | LIM homeobox 1b                                                                                                | 344                      | 99                       |
| ENSDART00000009151      | single-minded homolog 2 (Drosophila)                                                                           | 342                      | 82                       |
| ENSDART00000004751      | pre-B-cell leukemia transcription factor 2                                                                     | 336                      | 83                       |
| ENSDART00000082146      | forkhead box K2                                                                                                | 332                      | 79                       |
| ENSDART00000042194      | trh1 protein                                                                                                   | 330                      | 80                       |
| ENSDART00000017456      | ventral expressed homeobox                                                                                     | 322                      | 70                       |
| ENSDART00000030646      | sine oculis-related homeobox 6a                                                                                | 318                      | 104                      |
| ENSDART00000080693      | LIM homeobox 5                                                                                                 | 318                      | 97                       |
| ENSDART00000098022      | androgen receptor                                                                                              | 314                      | 74                       |
| ENSDART00000091694      | si:dkeyp-27e10.3                                                                                               | 309                      | 94                       |
| ENSDART00000099735      | zgc:136639                                                                                                     | 306                      | 68                       |
| ENSDART00000080461      | homeo box A1a                                                                                                  | 305                      | 82                       |
| ENSDART00000108802      | zgc:110712 Novel keratin protein                                                                               | 49,791                   | 9,912                    |
| ENSDART00000113801      | zgc:193505                                                                                                     | 47,987                   | 2,252                    |
| ENSDART000000063775     | zgc:153665                                                                                                     | 46,312                   | 1,786                    |
| ENSDART00000027701      | type I cytokeratin; zgc:109868; si:dkeyp-113d7.4                                                               | 45,037                   | 3,692                    |
| ENSDART00000105036      | keratin 15; type I cytokeratin, enveloping layer, like; si:dkeyp-113d7.7; type I cytokeratin, enveloping layer | 44,044                   | 12,026                   |
| ENSDART00000112399      | zgc:175088                                                                                                     | 42,524                   | 7,997                    |
| ENSDART000000081327     | keratin 5                                                                                                      | 41,928                   | 9,124                    |
| ENSDART00000053545      | zgc:153284                                                                                                     | 41,895                   | 1,484                    |
| ENSDART00000077352      | similar to PLAC8-like protein 1                                                                                | 40,866                   | 685                      |
| ENSDART00000013798      | nuclear factor of kappa light polypeptide gene enhancer in B-cells inhibitor, alpha a                          | 38,410                   | 1,272                    |
| ENSDART00000077880      | ictacalcin 2                                                                                                   | 37,692                   | 161                      |
| ENSDART00000066977      | BCL2-interacting killer (apoptosis-inducing)                                                                   | 37,509                   | 2,100                    |
| ENSDART00000018837      | glutathione S-transferase pi                                                                                   | 36,831                   | 7,350                    |
| ENSDART00000081039      | similar to es1 protein                                                                                         | 36,274                   | 2,632                    |
| ENSDART00000019004      | Rho GDP dissociation inhibitor (GDI) gamma                                                                     | 35,879                   | 10,601                   |
| ENSDART00000081527      | zgc:110788                                                                                                     | 34,548                   | 736                      |
| ENSDART00000102275      | zgc:153258                                                                                                     | 32,615                   | 1,437                    |
| ENSDART00000046945      | zgc:123068                                                                                                     | 32,095                   | 313                      |
| ENSDART00000011471      | zgc:101565                                                                                                     | 31,837                   | 988                      |

## Periderm-enriched profile

|                    |                                                                                                                         |        |       |
|--------------------|-------------------------------------------------------------------------------------------------------------------------|--------|-------|
| ENSDART00000105004 | keratin 15; type I cytokeratin, enveloping layer, like; si:dkeyp-113d7.7; type I cytokeratin, enveloping layer          | 30,910 | 856   |
| ENSDART0000011937  | ENSDARG0000073868                                                                                                       | 29,233 | 5,517 |
| ENSDART00000085763 | zgc:165571                                                                                                              | 27,911 | 843   |
| ENSDART00000093152 | zgc:154041                                                                                                              | 27,253 | 1,471 |
| ENSDART00000073726 | caveolin 2                                                                                                              | 26,061 | 1,394 |
| ENSDART00000100162 | wu:fc83c01                                                                                                              | 25,869 | 3,311 |
| ENSDART00000006947 | annexin A1c                                                                                                             | 25,709 | 5,472 |
| ENSDART00000075785 | zgc:110333; zgc:173444                                                                                                  | 24,899 | 3,294 |
| ENSDART00000074285 | synaptogyrin 2a                                                                                                         | 23,677 | 4,302 |
| ENSDART00000028960 | zgc:112340                                                                                                              | 23,054 | 7,580 |
| ENSDART00000099370 | HIU hydrolase                                                                                                           | 22,820 | 322   |
| ENSDART00000100818 | hypothetical LOC798921                                                                                                  | 22,803 | 115   |
| ENSDART00000115086 | similar to interleukin 16                                                                                               | 22,454 | 271   |
| ENSDART00000025691 | zgc:91835                                                                                                               | 22,404 | 952   |
| ENSDART00000017569 | tumor necrosis factor b (TNF superfamily, member 2)                                                                     | 22,025 | 1,018 |
| ENSDART00000056047 | similar to ADP-Ribosylation Factor related family member (arf-3); zgc:110286; hypothetical LOC791833                    | 21,750 | 2,361 |
| ENSDART00000082922 | zgc:158868                                                                                                              | 21,666 | 94    |
| ENSDART00000114811 | novel protein similar to vertebrate Rho guanine exchange factor (GEF) 16 (ARHGEF16)                                     | 21,451 | 1,845 |
| ENSDART00000100473 | si:rp71-61h23.4                                                                                                         | 20,911 | 5,471 |
| ENSDART00000082000 | ENSDARG00000059002                                                                                                      | 20,430 | 351   |
| ENSDART00000083520 | si:ch73-52e5.1                                                                                                          | 20,159 | 3,593 |
| ENSDART00000013480 | elongation of very long chain fatty acids (FEN1/Elo2, SUR4/Elo3, yeast)-like 1a                                         | 19,971 | 4,744 |
| ENSDART00000103340 | S100 calcium binding protein V1                                                                                         | 19,946 | 551   |
| ENSDART00000101301 | hypothetical LOC563037; transmembrane protease, serine 4a                                                               | 19,710 | 2,331 |
| ENSDART00000063320 | claudin e                                                                                                               | 19,683 | 912   |
| ENSDART00000112783 | transmembrane protein 45B                                                                                               | 19,451 | 872   |
| ENSDART00000026067 | similar to Sperm antigen with calponin homology and coiled-coil domains 1; CDKN1A interacting zinc finger protein 1     | 19,422 | 5,205 |
| ENSDART00000004679 | ictacalcin                                                                                                              | 18,784 | 277   |
| ENSDART00000084334 | prostaglandin I2 (prostacyclin) synthase like                                                                           | 18,436 | 190   |
| ENSDART00000102263 | ENSDARG0000045986                                                                                                       | 18,031 | 1,792 |
| ENSDART00000014034 | annexin A1b                                                                                                             | 17,923 | 238   |
| ENSDART00000111460 | si:ch211-229n2.7                                                                                                        | 17,462 | 82    |
| ENSDART00000076815 | zgc:92925                                                                                                               | 17,222 | 894   |
| ENSDART00000079806 | stromal membrane-associated protein 1                                                                                   | 17,124 | 4,235 |
| ENSDART00000099721 | zgc:153310                                                                                                              | 16,928 | 5,198 |
| ENSDART00000032603 | zgc:103456                                                                                                              | 16,878 | 929   |
| ENSDART00000087910 | suppression of tumorigenicity 14 (colon carcinoma) b                                                                    | 16,739 | 297   |
| ENSDART00000081646 | glutaredoxin (thioltransferase)                                                                                         | 16,703 | 4,749 |
| ENSDART00000038401 | hypothetical protein LOC553515                                                                                          | 16,392 | 787   |
| ENSDART00000092690 | zgc:158371; hypothetical LOC572167                                                                                      | 15,839 | 2,048 |
| ENSDART00000081636 | chromatin modifying protein 1A                                                                                          | 15,668 | 4,035 |
| ENSDART00000063325 | hypothetical LOC791933; claudin f                                                                                       | 15,302 | 1,052 |
| ENSDART00000003385 | anoctamin 1, calcium activated chloride channel                                                                         | 15,278 | 1,955 |
| ENSDART00000058612 | PYD and CARD domain containing                                                                                          | 15,091 | 1,103 |
| ENSDART00000075223 | cytochrome c oxidase, subunit VIIa 2                                                                                    | 15,071 | 3,590 |
| ENSDART00000100156 | 1-acylglycerol-3-phosphate O-acyltransferase 4 (lysophosphatidic acid acyltransferase, delta)                           | 14,950 | 4,490 |
| ENSDART00000114563 | transmembrane protein 129                                                                                               | 14,857 | 334   |
| ENSDART00000066904 | zgc:73329                                                                                                               | 14,755 | 4,379 |
| ENSDART00000035259 | microsomal glutathione S-transferase 1                                                                                  | 14,754 | 4,489 |
| ENSDART00000115371 | zgc:173552; similar to Mid1ip1 protein; hypothetical LOC559765; zgc:158701; zgc:158629; similar to His3:CG31613         | 14,668 | 4,843 |
| ENSDART00000108590 | sc:d173                                                                                                                 | 14,644 | 535   |
| ENSDART00000035850 | im:7158730; similar to LOC798527 protein                                                                                | 14,321 | 449   |
| ENSDART00000113155 | LIM domain and actin binding 1                                                                                          | 14,197 | 3,020 |
| ENSDART00000082503 | zgc:113390                                                                                                              | 14,029 | 748   |
| ENSDART00000102681 | nucleoside phosphorylase                                                                                                | 14,025 | 4,653 |
| ENSDART00000035274 | hypothetical LOC566487; globoside alpha-1,3-N-acetylgalactosaminyltransferase 1, like 4                                 | 14,017 | 807   |
| ENSDART00000089856 | hypothetical protein LOC100151319; tyrosine kinase, non-receptor, 2                                                     | 13,928 | 1,798 |
| ENSDART00000099859 | similar to Mid1ip1 protein; zgc:173545; zgc:165551; zgc:163047; similar to histone cluster 2, H2ab; hypothetical LOC    | 13,357 | 3,346 |
| ENSDART00000038228 | zgc:101676; hypothetical protein LOC100150494                                                                           | 13,316 | 2,740 |
| ENSDART00000081604 | adiponectin receptor 2                                                                                                  | 13,242 | 1,667 |
| ENSDART00000081216 | elongation of very long chain fatty acids (FEN1/Elo2, SUR4/Elo3, yeast)-like 1b                                         | 12,866 | 1,482 |
| ENSDART00000081440 | interleukin 11b                                                                                                         | 12,740 | 821   |
| ENSDART00000047552 | si:dkey-246k9.1; zgc:101107                                                                                             | 12,637 | 577   |
| ENSDART00000055241 | periplakin                                                                                                              | 12,433 | 309   |
| ENSDART00000010169 | si:ch211-215m21.17                                                                                                      | 12,217 | 1,796 |
| ENSDART00000023985 | zgc:153952                                                                                                              | 12,174 | 1,042 |
| ENSDART00000056790 | zgc:110256                                                                                                              | 12,077 | 3,825 |
| ENSDART00000100135 | hypothetical protein LOC100001903                                                                                       | 11,977 | 3,339 |
| ENSDART00000103265 | zgc:158773                                                                                                              | 11,970 | 735   |
| ENSDART00000067534 | Hrc protein                                                                                                             | 11,950 | 369   |
| ENSDART00000079373 | similar to interleukin 8                                                                                                | 11,851 | 42    |
| ENSDART00000108497 | zgc:173552; similar to Mid1ip1 protein; hypothetical LOC559765; zgc:158701; zgc:158629; similar to His3:CG31613         | 11,829 | 3,829 |
| ENSDART00000037341 | zgc:136817                                                                                                              | 11,743 | 1,424 |
| ENSDART00000009196 | zgc:63562                                                                                                               | 11,641 | 3,463 |
| ENSDART00000015240 | calpain, small subunit 1 a                                                                                              | 11,610 | 2,613 |
| ENSDART00000064512 | zgc:110283                                                                                                              | 11,521 | 2,232 |
| ENSDART00000103016 | zgc:173552; similar to Mid1ip1 protein; hypothetical LOC559765; zgc:158701; zgc:158629; similar to His3:CG31613         | 11,476 | 2,570 |
| ENSDART00000050988 | glucosaminyl (N-acetyl) transferase 4, core 2; similar to Beta-1,3-galactosyl-O-glycosyl-glycoprotein beta-1,6-N-acetyl | 11,395 | 1,580 |
| ENSDART00000004964 | NAD(P)H dehydrogenase, quinone 1                                                                                        | 11,383 | 1,479 |
| ENSDART00000113787 | ENSDARG00000079101; ENSDARG00000078352                                                                                  | 11,314 | 3,175 |
| ENSDART00000113216 | ENSDARG00000076395                                                                                                      | 11,207 | 2,487 |
| ENSDART00000041385 | zgc:163061                                                                                                              | 11,035 | 2,440 |
| ENSDART00000105315 | similar to 11-beta-hydroxysteroid dehydrogenase type 3; hydroxysteroid (11-beta) dehydrogenase 3                        | 10,937 | 1,253 |
| ENSDART00000109704 | zgc:173552; similar to Mid1ip1 protein; hypothetical LOC559765; zgc:158701; zgc:158629; similar to His3:CG31613         | 10,794 | 3,470 |
| ENSDART00000102300 | coronin, actin binding protein, 2A                                                                                      | 10,688 | 3,189 |
| ENSDART00000048632 | sulfotransferase family 2, cytosolic sulfotransferase 1                                                                 | 10,530 | 3,127 |
| ENSDART00000073404 | similar to Mid1ip1 protein; zgc:173545; zgc:165551; zgc:163047; similar to histone cluster 2, H2ab; hypothetical LOC    | 10,443 | 2,903 |
| ENSDART00000036597 | pleckstrin homology domain containing, family F (with FYVE domain) member 1                                             | 10,425 | 85    |
| ENSDART00000103293 | zgc:114172                                                                                                              | 10,345 | 2,966 |
| ENSDART00000097966 | SH3-domain GRB2-like 1a                                                                                                 | 10,228 | 723   |
| ENSDART00000014103 | hypothetical LOC791786; zgc:112148                                                                                      | 9,991  | 2,890 |
| ENSDART00000014058 | zgc:100829                                                                                                              | 9,890  | 1,027 |
| ENSDART00000098246 | si:dkey-7b17.2                                                                                                          | 9,804  | 1,213 |
| ENSDART00000056466 | calcium/calmodulin-dependent protein kinase (CaM kinase) II delta 1                                                     | 9,611  | 1,513 |
| ENSDART00000075299 | zgc:153911                                                                                                              | 9,490  | 963   |
| ENSDART00000105095 | zgc:92231                                                                                                               | 9,397  | 3,099 |
| ENSDART00000097814 | similar to Mid1ip1 protein; zgc:110434; zgc:173652                                                                      | 9,274  | 1,875 |

Periderm-enriched profile

|                    |                                                                                                                        |       |       |
|--------------------|------------------------------------------------------------------------------------------------------------------------|-------|-------|
| ENSDART00000018025 | guanine nucleotide binding protein (G protein), alpha 14                                                               | 9,252 | 753   |
| ENSDART00000097417 | similar to chromosome 9 open reading frame 19                                                                          | 9,237 | 90    |
| ENSDART00000047362 | si:dkey-221h15.1                                                                                                       | 9,148 | 2,421 |
| ENSDART00000052907 | aspartoacylase (aminocyclase) 3.1                                                                                      | 8,999 | 1,212 |
| ENSDART00000074290 | zgc:194158                                                                                                             | 8,944 | 89    |
| ENSDART00000058943 | zgc:110182                                                                                                             | 8,912 | 2,610 |
| ENSDART00000099887 | YTH domain family, member 1                                                                                            | 8,820 | 2,621 |
| ENSDART00000111340 | zgc:152936; zgc:174228; novel galactose binding lectin domain containing protein; si:dkey-240e12.6                     | 8,765 | 1,176 |
| ENSDART00000104499 | si:ch211-93f2.1                                                                                                        | 8,664 | 970   |
| ENSDART00000079448 | regulator of G-protein signaling 2                                                                                     | 8,499 | 1,464 |
| ENSDART00000057641 | tetraspanin 15                                                                                                         | 8,448 | 1,711 |
| ENSDART00000033936 | similar to sniffer CG10964-PA                                                                                          | 8,301 | 55    |
| ENSDART00000105694 | zgc:64213                                                                                                              | 8,063 | 2,569 |
| ENSDART00000098330 | novel protein similar to vertebrate natriuretic peptide precursor C (NPPC)                                             | 7,966 | 1,450 |
| ENSDART00000061821 | si:dkey-65b13.8; hypothetical LOC792109                                                                                | 7,927 | 1,273 |
| ENSDART00000059188 | Kruppel-like factor 2b                                                                                                 | 7,893 | 157   |
| ENSDART00000105666 | zgc:171660; si:ch211-234p6.8                                                                                           | 7,865 | 299   |
| ENSDART00000080107 | hypothetical protein LOC796266                                                                                         | 7,816 | 46    |
| ENSDART00000025451 | zgc:55456                                                                                                              | 7,688 | 842   |
| ENSDART00000075975 | zgc:103738                                                                                                             | 7,630 | 547   |
| ENSDART00000103006 | similar to Mid1p1 protein; zgc:110434; zgc:173652                                                                      | 7,470 | 2,395 |
| ENSDART00000103279 | si:ch211-240j22.2                                                                                                      | 7,394 | 138   |
| ENSDART00000010658 | serpin peptidase inhibitor, clade B (ovalbumin), member 1, like 3                                                      | 7,277 | 1,226 |
| ENSDART00000055903 | similar to Histone H4 replacement CG3379-PC; similar to predicted protein; similar to histone cluster 1, H2bc; similar | 7,272 | 1,444 |
| ENSDART00000088340 | si:ch211-203f9.2                                                                                                       | 7,250 | 812   |
| ENSDART00000113993 | ENSDARG00000078072                                                                                                     | 7,088 | 66    |
| ENSDART00000026559 | CD9 antigen, like                                                                                                      | 7,024 | 385   |
| ENSDART00000112994 | novel protein similar to vertebrate hect domain and RLD 3 (HERC3)                                                      | 7,023 | 863   |
| ENSDART00000077107 | similar to LOC563520 protein                                                                                           | 7,017 | 507   |
| ENSDART00000028225 | monoamine oxidase                                                                                                      | 6,968 | 2,070 |
| ENSDART00000114982 | zgc:165523; similar to Proteinase-activated receptor 2 precursor (PAR-2) (Thrombin receptor-like 1) (Coagulation fact  | 6,951 | 603   |
| ENSDART00000109256 | si:ch73-13b6.3                                                                                                         | 6,913 | 1,665 |
| ENSDART00000109962 | ENSDARG00000076208                                                                                                     | 6,887 | 2,217 |
| ENSDART00000103234 | GDP-mannose 4,6-dehydratase                                                                                            | 6,821 | 272   |
| ENSDART00000098917 | hypothetical LOC799662; hypothetical LOC561344                                                                         | 6,757 | 1,355 |
| ENSDART00000017427 | RNA-binding region (RNP1, RRM) containing 3                                                                            | 6,537 | 1,546 |
| ENSDART00000019508 | zgc:77740                                                                                                              | 6,486 | 637   |
| ENSDART00000101217 | zgc:136892                                                                                                             | 6,473 | 152   |
| ENSDART00000105898 | similar to rCG20339                                                                                                    | 6,437 | 2,136 |
| ENSDART00000112287 | wu:fc51b03                                                                                                             | 6,404 | 249   |
| ENSDART00000000221 | zgc:92533                                                                                                              | 6,392 | 1,714 |
| ENSDART00000074561 | lipopolysaccharide-induced TNF factor                                                                                  | 6,199 | 1,092 |
| ENSDART00000113587 | NADH dehydrogenase (ubiquinone) flavoprotein 3                                                                         | 6,167 | 1,678 |
| ENSDART00000058004 | hypothetical protein LOC553395                                                                                         | 6,146 | 1,285 |
| ENSDART00000102735 | ENSDARG00000070162                                                                                                     | 6,137 | 1,663 |
| ENSDART00000080549 | lysozyme                                                                                                               | 6,063 | 359   |
| ENSDART00000113012 | similar to Sequestosome 1; sequestosome 1                                                                              | 6,022 | 1,039 |
| ENSDART00000098879 | similar to ubiquitin carboxyl-terminal hydrolase CYLD                                                                  | 5,985 | 222   |
| ENSDART00000110387 | calpastatin                                                                                                            | 5,980 | 1,453 |
| ENSDART00000058839 | hypothetical LOC100000608; si:ch211-147d7.5                                                                            | 5,935 | 98    |
| ENSDART00000017668 | polypyrimidine tract binding protein 1a                                                                                | 5,822 | 1,716 |
| ENSDART00000091158 | zgc:154020                                                                                                             | 5,808 | 47    |
| ENSDART00000110535 | similar to MyoD family inhibitor domain containing protein                                                             | 5,547 | 223   |
| ENSDART00000059361 | ENSDARG00000040569                                                                                                     | 5,493 | 157   |
| ENSDART00000104628 | insulin-like 5                                                                                                         | 5,467 | 1,072 |
| ENSDART00000013553 | zgc:100868                                                                                                             | 5,451 | 34    |
| ENSDART00000056519 | similar to Probable G-protein coupled receptor 160                                                                     | 5,423 | 701   |
| ENSDART00000104917 | similar to LOC494811 protein                                                                                           | 5,403 | 90    |
| ENSDART00000104083 | S100 calcium binding protein V2                                                                                        | 5,400 | 454   |
| ENSDART00000076265 | zgc:91908; similar to transmembrane protein 30B                                                                        | 5,191 | 703   |
| ENSDART00000103757 | solute carrier family 6 (neurotransmitter transporter, GABA), member 11                                                | 5,110 | 257   |
| ENSDART00000012241 | kinesin family member 23                                                                                               | 5,083 | 323   |
| ENSDART00000061926 | syntaxin 11b.2                                                                                                         | 5,079 | 51    |
| ENSDART00000103692 | hypothetical LOC798070; si:ch211-105d11.2                                                                              | 5,078 | 663   |
| ENSDART00000026448 | si:ch211-157f15.1                                                                                                      | 5,056 | 108   |
| ENSDART00000062917 | connexin 35.4                                                                                                          | 5,050 | 310   |
| ENSDART00000109856 | similar to Mid1p1 protein; zgc:173545; zgc:165551; zgc:163047; similar to histone cluster 2, H2ab; hypothetical LOC    | 5,011 | 844   |
| ENSDART00000081196 | scinderin like b                                                                                                       | 4,986 | 450   |
| ENSDART00000040926 | eukaryotic translation initiation factor 4E binding protein 2                                                          | 4,964 | 319   |
| ENSDART00000011967 | annexin A2a                                                                                                            | 4,960 | 244   |
| ENSDART00000103024 | similar to Mid1p1 protein; zgc:173545; zgc:165551; zgc:163047; similar to histone cluster 2, H2ab; hypothetical LOC    | 4,945 | 1,074 |
| ENSDART00000110424 | similar to putative transmembrane protein TA-2                                                                         | 4,892 | 121   |
| ENSDART00000115094 | im:7138837                                                                                                             | 4,779 | 329   |
| ENSDART00000089358 | crumbs homolog 3b                                                                                                      | 4,751 | 729   |
| ENSDART00000022903 | hypothetical LOC791605; zgc:101780                                                                                     | 4,713 | 626   |
| ENSDART00000073402 | similar to Mid1p1 protein                                                                                              | 4,688 | 1,324 |
| ENSDART00000112708 | zgc:103510; fucosyltransferase 9                                                                                       | 4,674 | 124   |
| ENSDART00000059872 | zgc:153512; hypothetical LOC792290                                                                                     | 4,640 | 1,500 |
| ENSDART00000057101 | hypothetical LOC567132; zgc:174689; zgc:174688; zgc:113413                                                             | 4,621 | 156   |
| ENSDART00000036891 | zgc:86749                                                                                                              | 4,606 | 1,112 |
| ENSDART00000023838 | zgc:91985                                                                                                              | 4,606 | 294   |
| ENSDART00000045669 | ENSDARG00000034836                                                                                                     | 4,572 | 372   |
| ENSDART00000003195 | chromatin modifying protein 4C                                                                                         | 4,446 | 315   |
| ENSDART00000040998 | zgc:63910                                                                                                              | 4,382 | 1,005 |
| ENSDART00000007732 | calpain 9                                                                                                              | 4,182 | 85    |
| ENSDART00000092049 | hypothetical LOC100001318; zgc:158657                                                                                  | 4,135 | 180   |
| ENSDART00000045397 | syntaxin 11b.1                                                                                                         | 4,132 | 185   |
| ENSDART00000083433 | G patch domain containing 8                                                                                            | 4,130 | 1,334 |
| ENSDART00000106089 | enhancer of zeste homolog 2 (Drosophila)                                                                               | 4,114 | 604   |
| ENSDART00000035360 | finTRIM family, member 64                                                                                              | 4,083 | 727   |
| ENSDART00000097486 | zgc:153677                                                                                                             | 3,907 | 1,271 |
| ENSDART00000091094 | plasma membrane proteolipid                                                                                            | 3,895 | 699   |
| ENSDART00000020750 | keratin 18                                                                                                             | 3,855 | 1,038 |
| ENSDART00000111347 | ENSDARG00000075390                                                                                                     | 3,820 | 446   |
| ENSDART00000105440 | microsomal glutathione S-transferase 2                                                                                 | 3,812 | 992   |
| ENSDART00000113381 | novel rhamnose binding lectin; si:dkeyp-98a7.5; hypothetical LOC564145                                                 | 3,797 | 362   |
| ENSDART00000075529 | zgc:92869                                                                                                              | 3,776 | 1,011 |

Periderm-enriched profile

|                     |                                                                                                                        |       |       |
|---------------------|------------------------------------------------------------------------------------------------------------------------|-------|-------|
| ENSDART00000081359  | zgc:110425; hypothetical LOC791652                                                                                     | 3,755 | 549   |
| ENSDART00000042006  | BAI1-associated protein 2-like 1a                                                                                      | 3,724 | 929   |
| ENSDART000000113533 | ENSDARG00000078960                                                                                                     | 3,646 | 505   |
| ENSDART00000067370  | si:dkey-14d8.1                                                                                                         | 3,602 | 1,104 |
| ENSDART00000084501  | trichoplein, keratin filament binding                                                                                  | 3,586 | 1,175 |
| ENSDART000000101360 | zgc:56382; zgc:111983                                                                                                  | 3,567 | 38    |
| ENSDART00000098599  | si:ch211-151h10.2                                                                                                      | 3,545 | 427   |
| ENSDART000000100692 | ELOVL family member 7, elongation of long chain fatty acids (yeast) a                                                  | 3,542 | 430   |
| ENSDART00000002842  | zgc:110692                                                                                                             | 3,502 | 257   |
| ENSDART00000080113  | zgc:123339                                                                                                             | 3,477 | 50    |
| ENSDART00000007202  | zgc:92749                                                                                                              | 3,471 | 477   |
| ENSDART00000076193  | wu:fc88b11                                                                                                             | 3,465 | 419   |
| ENSDART000000100991 | hypothetical LOC791881; zgc:92357                                                                                      | 3,453 | 40    |
| ENSDART00000048507  | zgc:100959                                                                                                             | 3,430 | 1,098 |
| ENSDART00000077383  | zgc:114169                                                                                                             | 3,362 | 1,120 |
| ENSDART000000032778 | zgc:63907                                                                                                              | 3,355 | 572   |
| ENSDART000000105141 | similar to Ral guanine nucleotide dissociation stimulator-like 1 (RalGDS-like 1)                                       | 3,354 | 102   |
| ENSDART000000101563 | zgc:153136                                                                                                             | 3,351 | 130   |
| ENSDART00000075490  | peptide YYa                                                                                                            | 3,313 | 153   |
| ENSDART00000077111  | zgc:100900                                                                                                             | 3,281 | 312   |
| ENSDART00000043688  | si:dkey-24117.2                                                                                                        | 3,281 | 1,027 |
| ENSDART000000109136 | zgc:66382                                                                                                              | 3,258 | 871   |
| ENSDART00000063834  | zgc:86586                                                                                                              | 3,241 | 227   |
| ENSDART000000109423 | hydroxysteroid (17-beta) dehydrogenase 12a                                                                             | 3,237 | 541   |
| ENSDART00000009920  | LIM domain only 7a                                                                                                     | 3,222 | 574   |
| ENSDART000000114092 | novel rhamnose binding lectin; si:dkeyp-98a7.5; hypothetical LOC564145                                                 | 3,205 | 503   |
| ENSDART00000044552  | si:ch211-14a17.7                                                                                                       | 3,203 | 1,022 |
| ENSDART00000015277  | glutathione peroxidase 1b                                                                                              | 3,046 | 814   |
| ENSDART00000099885  | zgc:153893                                                                                                             | 2,962 | 350   |
| ENSDART00000075762  | TANK-binding kinase 1                                                                                                  | 2,936 | 637   |
| ENSDART000000112337 | similar to novel nacht domain containing protein                                                                       | 2,931 | 679   |
| ENSDART00000098119  | zgc:56488                                                                                                              | 2,926 | 784   |
| ENSDART000000109330 | ENSDARG00000074574                                                                                                     | 2,921 | 232   |
| ENSDART000000113223 | ENSDARG00000078975                                                                                                     | 2,881 | 52    |
| ENSDART000000109774 | zgc:86915; zgc:171947; zgc:171945; zgc:101673; zgc:153597                                                              | 2,845 | 566   |
| ENSDART000000106244 | zgc:152652; wu:fd20g04; hypothetical LOC573106; zgc:171750; wu:fd20f07                                                 | 2,834 | 705   |
| ENSDART00000059923  | max interacting protein                                                                                                | 2,801 | 457   |
| ENSDART000000104319 | similar to inositol 1,4,5-trisphosphate 3-kinase A; inositol 1,4,5-trisphosphate 3-kinase A                            | 2,797 | 277   |
| ENSDART00000080842  | kit ligand b                                                                                                           | 2,786 | 268   |
| ENSDART00000043276  | similar to erythrocyte membrane protein band 4.1 like 5; erythrocyte membrane protein band 4.1 like 5                  | 2,775 | 655   |
| ENSDART000000110638 | zgc:152936; zgc:174228; novel galactose binding lectin domain containing protein; si:dkey-240e12.6                     | 2,770 | 192   |
| ENSDART000000102776 | caspase a                                                                                                              | 2,763 | 84    |
| ENSDART00000084828  | ENSDARG00000060313                                                                                                     | 2,755 | 84    |
| ENSDART00000079899  | si:dkey-8113.4                                                                                                         | 2,732 | 186   |
| ENSDART00000097583  | similar to Os05g0242100; zgc:172187; similar to polytene protein; zgc:153686                                           | 2,720 | 745   |
| ENSDART00000063041  | zgc:64187                                                                                                              | 2,681 | 166   |
| ENSDART00000018159  | wu:fa28c04                                                                                                             | 2,637 | 776   |
| ENSDART00000012600  | galactokinase 2                                                                                                        | 2,608 | 165   |
| ENSDART00000016422  | MAP kinase-interacting serine/threonine kinase 2b                                                                      | 2,586 | 537   |
| ENSDART00000036871  | hypothetical LOC569653                                                                                                 | 2,557 | 50    |
| ENSDART000000114639 | interleukin 12a                                                                                                        | 2,520 | 385   |
| ENSDART00000082192  | zgc:63514                                                                                                              | 2,503 | 225   |
| ENSDART00000041414  | caspase 6, apoptosis-related cysteine peptidase, like 1                                                                | 2,496 | 36    |
| ENSDART00000028854  | apoptosis antagonizing transcription factor                                                                            | 2,433 | 219   |
| ENSDART00000074587  | progesterin and adipoQ receptor family member Vb                                                                       | 2,432 | 27    |
| ENSDART00000079645  | zgc:174164                                                                                                             | 2,388 | 117   |
| ENSDART00000053798  | calmodulin 2b, (phosphorylase kinase, delta); calmodulin 2a (phosphorylase kinase, delta); calmodulin 3a (phosphory    | 2,385 | 780   |
| ENSDART00000078625  | si:dkey-98p3.2; zgc:136613; hypothetical protein LOC100150222                                                          | 2,361 | 131   |
| ENSDART00000006923  | ATP synthase, H+ transporting, mitochondrial F0 complex, subunit s                                                     | 2,358 | 459   |
| ENSDART00000052789  | C1GALT1-specific chaperone 1                                                                                           | 2,337 | 148   |
| ENSDART00000054063  | gamma-glutamyl hydrolase (conjugase, folypolyglutamyldase)                                                             | 2,312 | 384   |
| ENSDART00000078983  | coiled-coil domain containing 125; similar to Kenae                                                                    | 2,309 | 746   |
| ENSDART000000106032 | ENSDARG00000077673                                                                                                     | 2,284 | 25    |
| ENSDART000000103027 | similar to Histone H4 replacement CG3379-PC; similar to predicted protein; similar to histone cluster 1, H2bc; similar | 2,269 | 626   |
| ENSDART00000067841  | zgc:112038                                                                                                             | 2,233 | 47    |
| ENSDART00000080054  | crystallin, gamma S3                                                                                                   | 2,227 | 197   |
| ENSDART00000093004  | ENSDARG00000071357                                                                                                     | 2,222 | 36    |
| ENSDART00000021620  | claudin d                                                                                                              | 2,221 | 118   |
| ENSDART00000077861  | similar to family with sequence similarity 132, member A                                                               | 2,199 | 427   |
| ENSDART00000021992  | ENSDARG00000012990                                                                                                     | 2,197 | 347   |
| ENSDART00000009093  | similar to MGC84951 protein                                                                                            | 2,159 | 601   |
| ENSDART00000050000  | thyroid stimulating hormone, beta subunit                                                                              | 2,114 | 59    |
| ENSDART00000024726  | dishevelled associated activator of morphogenesis 1                                                                    | 2,090 | 120   |
| ENSDART00000067292  | parathyroid hormone 1a                                                                                                 | 2,083 | 237   |
| ENSDART00000098274  | si:ch211-117m20.5                                                                                                      | 2,083 | 31    |
| ENSDART00000074099  | ENSDARG00000052277                                                                                                     | 2,080 | 403   |
| ENSDART00000051528  | S100 calcium binding protein U                                                                                         | 2,058 | 455   |
| ENSDART00000060744  | si:dkey-7c18.24                                                                                                        | 2,031 | 42    |
| ENSDART00000099537  | zgc:153978                                                                                                             | 2,026 | 401   |
| ENSDART000000108845 | similar to Latrophilin-2 precursor (Calcium-independent alpha-latrotoxin receptor 2) (Latrophilin homolog 1) (Lectome  | 2,020 | 508   |
| ENSDART000000113681 | similar to Histone H4 replacement CG3379-PC; similar to predicted protein; similar to histone cluster 1, H2bc; similar | 1,997 | 501   |
| ENSDART00000091805  | si:dkeyp-1h4.1                                                                                                         | 1,951 | 510   |
| ENSDART00000065590  | zgc:56565                                                                                                              | 1,950 | 383   |
| ENSDART00000081451  | arginine vasopressin-like                                                                                              | 1,944 | 83    |
| ENSDART000000110550 | breast cancer anti-estrogen resistance 3                                                                               | 1,941 | 275   |
| ENSDART00000079631  | zgc:154013                                                                                                             | 1,918 | 394   |
| ENSDART00000000250  | solute carrier family 40 (iron-regulated transporter), member 1                                                        | 1,915 | 269   |
| ENSDART000000102939 | hypothetical protein LOC799862                                                                                         | 1,909 | 277   |
| ENSDART00000085976  | Smg-7 homolog, nonsense mediated mRNA decay factor (C. elegans)                                                        | 1,836 | 540   |
| ENSDART00000078066  | zgc:153436                                                                                                             | 1,835 | 198   |
| ENSDART00000025644  | protein phosphatase 2, regulatory subunit B', alpha isoform                                                            | 1,818 | 228   |
| ENSDART00000026264  | ENSDARG00000079731                                                                                                     | 1,815 | 596   |
| ENSDART00000027237  | hypothetical LOC563897                                                                                                 | 1,808 | 390   |
| ENSDART000000101676 | si:ch211-219a4.3                                                                                                       | 1,796 | 313   |
| ENSDART000000112403 | zgc:171965                                                                                                             | 1,779 | 139   |
| ENSDART00000099834  | hypothetical protein LOC100150220; hypothetical protein LOC553308; hypothetical protein LOC100151128; si:ch211-        | 1,772 | 141   |
| ENSDART000000114775 | similar to Histone H4 replacement CG3379-PC; similar to predicted protein; similar to histone cluster 1, H2bc; similar | 1,772 | 421   |

Periderm-enriched profile

|                     |                                                                                                                        |       |     |
|---------------------|------------------------------------------------------------------------------------------------------------------------|-------|-----|
| ENSDART00000099540  | ENSDARG00000068740                                                                                                     | 1,770 | 491 |
| ENSDART00000033691  | tuberoinfundibular peptide of 39 amino acids; parathyroid hormone 2                                                    | 1,760 | 86  |
| ENSDART00000066439  | cholesterol 25-hydroxylase                                                                                             | 1,754 | 69  |
| ENSDART00000097719  | cadherin 1, epithelial                                                                                                 | 1,753 | 361 |
| ENSDART00000028093  | claudin 10 like                                                                                                        | 1,740 | 74  |
| ENSDART00000012284  | zgc:63546; cytochrome P450 CYP2AA3v1                                                                                   | 1,736 | 437 |
| ENSDART00000013668  | sulfide quinone reductase-like (yeast)                                                                                 | 1,681 | 420 |
| ENSDART00000078033  | similar to mitochondrial alanine aminotransferase                                                                      | 1,678 | 287 |
| ENSDART00000092648  | zgc:153239                                                                                                             | 1,677 | 362 |
| ENSDART00000064922  | hypothetical protein LOC100150019; muscle, skeletal, receptor tyrosine kinase                                          | 1,663 | 424 |
| ENSDART00000017947  | coiled-coil domain containing 146                                                                                      | 1,658 | 306 |
| ENSDART000000115410 | ENSDARG00000077976                                                                                                     | 1,657 | 41  |
| ENSDART00000056561  | S100 calcium binding protein Z                                                                                         | 1,655 | 195 |
| ENSDART00000032702  | similar to preprosomatostatin-II                                                                                       | 1,654 | 489 |
| ENSDART00000083406  | similar to B-box and SPRY domain containing                                                                            | 1,644 | 91  |
| ENSDART00000029649  | Parkinson disease (autosomal recessive, juvenile) 2, parkin                                                            | 1,640 | 178 |
| ENSDART00000062536  | zgc:56136                                                                                                              | 1,616 | 441 |
| ENSDART00000061947  | ENSDARG00000074599                                                                                                     | 1,608 | 352 |
| ENSDART00000048589  | similar to Histone H4 replacement CG3379-PC; similar to predicted protein; similar to histone cluster 1, H2bc; similar | 1,606 | 488 |
| ENSDART00000075643  | hypothetical protein LOC100150738; zgc:101785                                                                          | 1,605 | 119 |
| ENSDART00000012889  | connexin 28.6                                                                                                          | 1,597 | 47  |
| ENSDART00000098363  | tumor protein p63 regulated 1-like                                                                                     | 1,591 | 405 |
| ENSDART00000067356  | wu:fl26e04                                                                                                             | 1,587 | 31  |
| ENSDART00000066789  | STAR3 N-terminal like                                                                                                  | 1,583 | 402 |
| ENSDART000000103900 | similar to Serine/threonine-protein kinase Pim-3; hypothetical protein LOC100149825                                    | 1,582 | 357 |
| ENSDART00000058706  | similar to c-FosLb protein                                                                                             | 1,573 | 268 |
| ENSDART000000114938 | hypothetical LOC100000713                                                                                              | 1,569 | 429 |
| ENSDART00000062516  | zgc:172225; si:ch211-234p6.13                                                                                          | 1,566 | 305 |
| ENSDART00000036273  | ENSDARG00000070847                                                                                                     | 1,542 | 177 |
| ENSDART000000115276 | fibroblast growth factor (acidic) intracellular binding protein, like                                                  | 1,541 | 320 |
| ENSDART00000075928  | integral membrane protein 1                                                                                            | 1,502 | 482 |
| ENSDART000000109913 | ENSDARG00000074049                                                                                                     | 1,499 | 81  |
| ENSDART00000038364  | similar to carbonic anhydrase II; hypothetical LOC792230; carbonic anhydrase II                                        | 1,499 | 151 |
| ENSDART000000110252 | protein phosphatase 2, regulatory subunit B', gamma isoform                                                            | 1,479 | 418 |
| ENSDART00000031365  | zgc:63658                                                                                                              | 1,460 | 339 |
| ENSDART00000075276  | ENSDARG00000053258                                                                                                     | 1,458 | 224 |
| ENSDART00000098823  | similar to Serine/threonine-protein kinase Pim-3                                                                       | 1,454 | 144 |
| ENSDART000000106043 | ENSDARG00000076907                                                                                                     | 1,452 | 468 |
| ENSDART00000073447  | similar to LOC495114 protein                                                                                           | 1,447 | 128 |
| ENSDART00000097515  | ENSDARG00000067706                                                                                                     | 1,435 | 409 |
| ENSDART00000091760  | si:dkey-3n2.7                                                                                                          | 1,435 | 140 |
| ENSDART00000067537  | ELOVL family member 6, elongation of long chain fatty acids like                                                       | 1,435 | 187 |
| ENSDART00000033872  | troponin I, skeletal, fast 2a.1                                                                                        | 1,433 | 318 |
| ENSDART000000112955 | ENSDARG00000079639                                                                                                     | 1,432 | 424 |
| ENSDART000000108851 | ENSDARG00000076945                                                                                                     | 1,430 | 69  |
| ENSDART00000061477  | ENSDARG00000041947                                                                                                     | 1,429 | 68  |
| ENSDART00000046174  | zgc:100942                                                                                                             | 1,424 | 95  |
| ENSDART00000097759  | hypothetical LOC793992; hypothetical LOC794063; hypothetical protein LOC793802                                         | 1,417 | 121 |
| ENSDART00000061076  | caveolin 1                                                                                                             | 1,412 | 101 |
| ENSDART00000056280  | similar to phosphofructokinase, platelet                                                                               | 1,403 | 169 |
| ENSDART00000073401  | zgc:173552; similar to Mid1ip1 protein; hypothetical LOC559765; zgc:158701; zgc:158629; similar to His3:CG31613        | 1,402 | 339 |
| ENSDART000000113685 | ENSDARG00000075740                                                                                                     | 1,397 | 245 |
| ENSDART00000076816  | zgc:103594                                                                                                             | 1,387 | 355 |
| ENSDART000000101615 | ENSDARG00000069695                                                                                                     | 1,368 | 301 |
| ENSDART000000105314 | si:ch211-226h8.14                                                                                                      | 1,359 | 423 |
| ENSDART000000101556 | ArfGAP with SH3 domain, ankyrin repeat and PH domain 2b                                                                | 1,351 | 196 |
| ENSDART00000067175  | periphilin 1                                                                                                           | 1,340 | 374 |
| ENSDART00000064554  | protein phosphatase 2, regulatory subunit B', gamma                                                                    | 1,335 | 332 |
| ENSDART00000056598  | polo-like kinase 3 (Drosophila)                                                                                        | 1,334 | 292 |
| ENSDART00000017402  | zgc:92046                                                                                                              | 1,334 | 274 |
| ENSDART00000027353  | F-box and WD-40 domain protein 5                                                                                       | 1,333 | 168 |
| ENSDART000000109977 | si:ch211-250e5.3                                                                                                       | 1,332 | 259 |
| ENSDART000000106473 | si:dkey-15h8.11; si:dkey-15h8.10                                                                                       | 1,330 | 244 |
| ENSDART00000009971  | sorting nexin 33                                                                                                       | 1,325 | 223 |
| ENSDART000000113870 | zgc:173552; similar to Mid1ip1 protein; hypothetical LOC559765; zgc:158701; zgc:158629; similar to His3:CG31613        | 1,323 | 145 |
| ENSDART00000031952  | zgc:66450                                                                                                              | 1,311 | 216 |
| ENSDART00000020914  | glucose phosphate isomerase b                                                                                          | 1,309 | 254 |
| ENSDART00000051186  | nonspecific cytotoxic cell receptor protein 1                                                                          | 1,303 | 77  |
| ENSDART00000084305  | crumbs homolog 2, like                                                                                                 | 1,301 | 94  |
| ENSDART000000051271 | FCH domain only 2                                                                                                      | 1,296 | 208 |
| ENSDART00000035080  | zgc:158263                                                                                                             | 1,291 | 140 |
| ENSDART00000097149  | hypothetical LOC565353                                                                                                 | 1,289 | 233 |
| ENSDART00000041088  | reticulin 3                                                                                                            | 1,282 | 83  |
| ENSDART00000008134  | tripartite motif-containing 3b                                                                                         | 1,278 | 276 |
| ENSDART000000103831 | zgc:153923                                                                                                             | 1,276 | 261 |
| ENSDART000000665402 | zgc:77262                                                                                                              | 1,275 | 186 |
| ENSDART000000110429 | zgc:194297                                                                                                             | 1,258 | 167 |
| ENSDART00000093236  | ENSDARG00000063672                                                                                                     | 1,255 | 417 |
| ENSDART00000065819  | chloride intracellular channel a                                                                                       | 1,252 | 139 |
| ENSDART00000089150  | si:dkey-265o13.4                                                                                                       | 1,246 | 129 |
| ENSDART000000109949 | ENSDARG00000079668                                                                                                     | 1,245 | 390 |
| ENSDART00000017756  | cathepsin L1                                                                                                           | 1,242 | 59  |
| ENSDART00000051666  | protein phosphatase 1F (PP2C domain containing)                                                                        | 1,239 | 231 |
| ENSDART000000112410 | ENSDARG00000077860                                                                                                     | 1,237 | 357 |
| ENSDART00000098603  | si:ch211-151h10.1                                                                                                      | 1,235 | 52  |
| ENSDART00000097511  | ENSDARG00000067703                                                                                                     | 1,232 | 317 |
| ENSDART00000052649  | similar to SH3 domain binding protein CR16                                                                             | 1,230 | 343 |
| ENSDART000000102721 | similar to socius                                                                                                      | 1,228 | 109 |
| ENSDART00000011906  | zgc:110602                                                                                                             | 1,216 | 95  |
| ENSDART000000108532 | ENSDARG00000076567                                                                                                     | 1,214 | 113 |
| ENSDART00000019593  | zgc:92416                                                                                                              | 1,193 | 33  |
| ENSDART00000083558  | zgc:153995                                                                                                             | 1,190 | 275 |
| ENSDART00000098076  | similar to c-src tyrosine kinase                                                                                       | 1,186 | 237 |
| ENSDART00000061753  | fatty acyl CoA reductase 1                                                                                             | 1,185 | 52  |
| ENSDART00000039987  | phosphoglucomutase 3                                                                                                   | 1,181 | 361 |
| ENSDART00000032996  | pancreatic progenitor cell differentiation and proliferation factor a                                                  | 1,170 | 366 |
| ENSDART00000038310  | zgc:101654                                                                                                             | 1,168 | 233 |

Periderm-enriched profile

|                     |                                                                                                                            |       |     |
|---------------------|----------------------------------------------------------------------------------------------------------------------------|-------|-----|
| ENSDART0000025016   | keratin 15; type I cytokeratin, enveloping layer, like; si:dkeyp-113d7.7; type I cytokeratin, enveloping layer             | 1,166 | 82  |
| ENSDART0000002778   | hypothetical LOC792015; zgc:63689                                                                                          | 1,159 | 146 |
| ENSDART0000009839   | zgc:172250                                                                                                                 | 1,149 | 298 |
| ENSDART00000101724  | v-mos Moloney murine sarcoma viral oncogene homolog                                                                        | 1,146 | 272 |
| ENSDART00000066620  | type I cytokeratin; zgc:109868; si:dkeyp-113d7.4                                                                           | 1,134 | 87  |
| ENSDART00000064186  | similar to coxsackie virus and adenovirus receptor                                                                         | 1,128 | 35  |
| ENSDART00000018163  | si:dkey-223n17.3                                                                                                           | 1,126 | 64  |
| ENSDART00000114859  | zgc:92020                                                                                                                  | 1,125 | 176 |
| ENSDART00000023337  | N-acyl phosphatidylethanolamine phospholipase D                                                                            | 1,121 | 159 |
| ENSDART00000014385  | ELOVL family member 7, elongation of long chain fatty acids (yeast) b                                                      | 1,119 | 182 |
| ENSDART00000045549  | zgc:91936                                                                                                                  | 1,119 | 47  |
| ENSDART00000104344  | ecotropic viral integration site 5; similar to Ecotropic viral integration site 5 protein homolog (EVI-5) (Neuroblastoma s | 1,102 | 358 |
| ENSDART00000076083  | CDC42 effector protein (Rho GTPase binding) 2                                                                              | 1,094 | 121 |
| ENSDART00000008590  | inositol 1,3,4-triphosphate 5/6 kinase                                                                                     | 1,087 | 193 |
| ENSDART00000064991  | similar to Serine/threonine-protein kinase Pim-3                                                                           | 1,086 | 343 |
| ENSDART00000043403  | hypothetical protein LOC100150162; zgc:85680                                                                               | 1,074 | 181 |
| ENSDART00000025724  | zgc:63831                                                                                                                  | 1,069 | 116 |
| ENSDART00000077635  | si:ch211-103n10.5                                                                                                          | 1,066 | 265 |
| ENSDART00000024415  | wu:fd10h02                                                                                                                 | 1,064 | 159 |
| ENSDART00000047529  | hypothetical LOC100001689; zgc:158388                                                                                      | 1,060 | 274 |
| ENSDART00000061843  | SMEK homolog 1, suppressor of mek1 (Dictyostelium)                                                                         | 1,059 | 98  |
| ENSDART00000053221  | ADP-ribosylation factor-like 11                                                                                            | 1,055 | 54  |
| ENSDART00000098282  | si:ch211-198o12.4                                                                                                          | 1,054 | 338 |
| ENSDART00000074335  | ENSDARG00000074725                                                                                                         | 1,039 | 131 |
| ENSDART00000018064  | zgc:152791                                                                                                                 | 1,038 | 170 |
| ENSDART00000018909  | es1 protein                                                                                                                | 1,030 | 87  |
| ENSDART00000112081  | hematopoietic cell signal transducer                                                                                       | 1,030 | 122 |
| ENSDART00000110956  | hypothetical LOC796588                                                                                                     | 1,028 | 324 |
| ENSDART00000039204  | tripartite motif-containing 25-like                                                                                        | 1,027 | 263 |
| ENSDART00000101775  | annexin A11a                                                                                                               | 1,009 | 294 |
| ENSDART00000030205  | BCL2/adenovirus E1B interacting protein 3-like                                                                             | 1,009 | 173 |
| ENSDART00000099482  | similar to kinase suppressor of ras 1                                                                                      | 1,004 | 300 |
| ENSDART00000078045  | baculoviral IAP repeat-containing 5B                                                                                       | 1,001 | 148 |
| ENSDART00000041942  | zgc:110586                                                                                                                 | 1,001 | 309 |
| ENSDART00000023690  | zgc:92480; calpain 2, (m/II) large subunit, like                                                                           | 999   | 59  |
| ENSDART00000114349  | neuregulin 1                                                                                                               | 998   | 137 |
| ENSDART00000081926  | similar to hyperpolarization activated cyclic nucleotide-gated potassium channel 2                                         | 995   | 312 |
| ENSDART00000041396  | ENSDARG00000032801                                                                                                         | 986   | 36  |
| ENSDART00000098434  | ENSDARG00000035568                                                                                                         | 982   | 42  |
| ENSDART00000062170  | ENSDARG00000042400                                                                                                         | 976   | 223 |
| ENSDART00000050330  | mediator complex subunit 24                                                                                                | 974   | 255 |
| ENSDART00000045555  | zgc:63637                                                                                                                  | 973   | 162 |
| ENSDART00000089294  | TBC1 (tre-2/USP6, BUB2, cdc16) domain family, member 1                                                                     | 971   | 246 |
| ENSDART00000097770  | guanylyl cyclase 3                                                                                                         | 966   | 165 |
| ENSDART00000097330  | ENSDARG00000009281                                                                                                         | 950   | 255 |
| ENSDART00000036277  | histone deacetylase 4                                                                                                      | 950   | 311 |
| ENSDART00000077720  | similar to Glutamate decarboxylase 1 (Glutamate decarboxylase 67 kDa isoform) (GAD-67) (67 kDa glutamic acid dec           | 950   | 35  |
| ENSDART00000062360  | nucleoporin 205                                                                                                            | 948   | 249 |
| ENSDART00000027784  | carboxyl ester lipase, tandem duplicate 1                                                                                  | 944   | 53  |
| ENSDART00000112721  | ENSDARG00000077076                                                                                                         | 940   | 256 |
| ENSDART00000013972  | similar to absent in melanoma 1-like                                                                                       | 940   | 52  |
| ENSDART00000063398  | zgc:113255                                                                                                                 | 938   | 178 |
| ENSDART00000114885  | zgc:103715                                                                                                                 | 937   | 216 |
| ENSDART00000038301  | similar to glucosamine-6-phosphate deaminase 2                                                                             | 936   | 149 |
| ENSDART00000066778  | acyl-Coenzyme A dehydrogenase family, member 11                                                                            | 936   | 254 |
| ENSDART00000075346  | hypothetical LOC797100; hypothetical LOC794599; hypothetical protein LOC100003716                                          | 934   | 265 |
| ENSDART00000075563  | zgc:114136                                                                                                                 | 931   | 308 |
| ENSDART000000009182 | aquaporin 3                                                                                                                | 925   | 34  |
| ENSDART00000084834  | similar to SLIT-ROBO Rho GTPase activating protein 3                                                                       | 923   | 195 |
| ENSDART00000114161  | similar to transmembrane protein 184b                                                                                      | 922   | 222 |
| ENSDART00000104066  | si:dkey-239i20.1                                                                                                           | 921   | 168 |
| ENSDART00000012717  | EH-domain containing 1                                                                                                     | 919   | 126 |
| ENSDART00000060347  | crystallin, gamma S2                                                                                                       | 915   | 199 |
| ENSDART00000051777  | zgc:101664; hypothetical LOC791695                                                                                         | 907   | 284 |
| ENSDART00000041215  | ENSDARG00000003046                                                                                                         | 902   | 182 |
| ENSDART00000067594  | zgc:153129; hypothetical LOC570536                                                                                         | 901   | 264 |
| ENSDART00000082920  | ENSDARG00000059567                                                                                                         | 901   | 254 |
| ENSDART00000112104  | zgc:112210; zgc:113291; zgc:101129                                                                                         | 900   | 105 |
| ENSDART00000005929  | ENSDARG00000004988                                                                                                         | 896   | 72  |
| ENSDART00000057960  | similar to novel notch family protein; si:ch211-221n20.8; si:dkey-235d18.5                                                 | 890   | 189 |
| ENSDART00000057848  | similar to mCG1046517                                                                                                      | 888   | 85  |
| ENSDART00000016300  | crystallin, gamma M4; fibulin 4                                                                                            | 886   | 74  |
| ENSDART00000064394  | ENSDARG00000025108                                                                                                         | 884   | 213 |
| ENSDART00000090375  | similar to zinc finger CCH-type containing 12B                                                                             | 879   | 115 |
| ENSDART00000062081  | zgc:101053; similar to endothelial differentiation, lysophosphatidic acid G-protein-coupled receptor, 2                    | 877   | 282 |
| ENSDART00000100937  | zgc:158239                                                                                                                 | 877   | 209 |
| ENSDART00000057624  | zgc:110353                                                                                                                 | 876   | 54  |
| ENSDART00000055500  | ENSDARG00000038072                                                                                                         | 871   | 41  |
| ENSDART00000093122  | ENSDARG00000076053                                                                                                         | 871   | 90  |
| ENSDART00000031253  | LIM domain containing preferred translocation partner in lipoma                                                            | 870   | 194 |
| ENSDART00000032827  | zgc:162964                                                                                                                 | 868   | 197 |
| ENSDART00000043251  | hypothetical LOC791718; Der1-like domain family, member 3                                                                  | 867   | 247 |
| ENSDART00000028635  | zgc:136412                                                                                                                 | 864   | 176 |
| ENSDART00000084859  | similar to RAB GTPase activating protein 1-like                                                                            | 851   | 64  |
| ENSDART00000081438  | ENSDARG00000058558                                                                                                         | 847   | 202 |
| ENSDART00000081802  | ENSDARG00000058869                                                                                                         | 840   | 61  |
| ENSDART00000032547  | leukocyte cell-derived chemotaxin 2 like                                                                                   | 839   | 82  |
| ENSDART00000004240  | zgc:162180                                                                                                                 | 834   | 95  |
| ENSDART00000110738  | MYB binding protein (P160) 1a-like                                                                                         | 829   | 223 |
| ENSDART00000010373  | keratin, type 1, gene 19d                                                                                                  | 824   | 73  |
| ENSDART00000021864  | zgc:77906                                                                                                                  | 820   | 120 |
| ENSDART00000098001  | ENSDARG00000067969                                                                                                         | 819   | 197 |
| ENSDART00000045888  | similar to transketolase                                                                                                   | 818   | 202 |
| ENSDART00000109428  | ENSDARG00000076389                                                                                                         | 815   | 258 |
| ENSDART0000012677   | ENSDARG00000045556                                                                                                         | 814   | 175 |
| ENSDART00000101159  | zgc:77173                                                                                                                  | 812   | 38  |
| ENSDART00000115351  | similar to APurinic/apyrimidinic endoNuclease family member (apn-1)                                                        | 812   | 259 |

Periderm-enriched profile

|                    |                                                                                                                        |     |     |
|--------------------|------------------------------------------------------------------------------------------------------------------------|-----|-----|
| ENSDART0000066863  | v-ral simian leukemia viral oncogene homolog A (ras related)                                                           | 810 | 250 |
| ENSDART00000114499 | ENSDARG0000074327                                                                                                      | 809 | 183 |
| ENSDART00000028115 | cofactor required for Sp1 transcriptional activation, subunit 3                                                        | 803 | 208 |
| ENSDART00000083569 | ornithine decarboxylase antizyme 2, like                                                                               | 798 | 235 |
| ENSDART00000098504 | zgc:101815                                                                                                             | 795 | 152 |
| ENSDART00000019006 | neural cell adhesion molecule 3                                                                                        | 795 | 216 |
| ENSDART00000079698 | 5-hydroxytryptamine (serotonin) receptor 1A b                                                                          | 793 | 133 |
| ENSDART00000074812 | zgc:111868; hypothetical LOC791857                                                                                     | 793 | 151 |
| ENSDART00000080749 | eps8-like1                                                                                                             | 793 | 82  |
| ENSDART00000075926 | sciellin                                                                                                               | 792 | 117 |
| ENSDART00000005727 | UDP-galactose-4-epimerase                                                                                              | 792 | 88  |
| ENSDART00000023646 | zinc finger protein 513                                                                                                | 792 | 89  |
| ENSDART00000013851 | collagen, type IV, alpha 3 (Goodpasture antigen) binding protein                                                       | 791 | 162 |
| ENSDART00000082726 | zgc:158784                                                                                                             | 790 | 217 |
| ENSDART00000087148 | cerebellin 4 precursor                                                                                                 | 790 | 216 |
| ENSDART00000083827 | heparan sulfate (glucosamine) 3-O-sulfotransferase 3-like                                                              | 786 | 236 |
| ENSDART00000059796 | zgc:136929                                                                                                             | 785 | 82  |
| ENSDART00000057266 | ENSDARG00000039197                                                                                                     | 785 | 256 |
| ENSDART00000099023 | zgc:63670                                                                                                              | 785 | 198 |
| ENSDART00000033902 | similar to PHD finger protein 6                                                                                        | 782 | 44  |
| ENSDART00000044518 | ENSDARG00000078961                                                                                                     | 780 | 258 |
| ENSDART00000028237 | calcium/calmodulin-dependent protein kinase 1, alpha                                                                   | 774 | 217 |
| ENSDART00000039871 | cytoplasmic linker associated protein 2                                                                                | 769 | 178 |
| ENSDART00000012994 | zgc:110083                                                                                                             | 768 | 62  |
| ENSDART00000056495 | similar to LOC553398 protein; hypothetical protein LOC553398                                                           | 766 | 144 |
| ENSDART00000106595 | hypothetical protein LOC100006474; hypothetical LOC792855; zgc:171318; similar to Zinc finger protein 658; zgc:12      | 765 | 251 |
| ENSDART00000114238 | coagulation factor II (thrombin)                                                                                       | 765 | 76  |
| ENSDART00000098492 | similar to spectrin, beta, non-erythrocytic 1                                                                          | 760 | 149 |
| ENSDART00000104570 | zgc:175171                                                                                                             | 755 | 164 |
| ENSDART00000097773 | subcommissural organ spondin                                                                                           | 753 | 222 |
| ENSDART00000114715 | similar to alpha 1,2-mannosidase                                                                                       | 750 | 213 |
| ENSDART00000062426 | zgc:123246                                                                                                             | 749 | 238 |
| ENSDART00000099733 | coagulation factor II (thrombin) receptor-like 1                                                                       | 749 | 55  |
| ENSDART00000113134 | caspase b                                                                                                              | 749 | 239 |
| ENSDART00000106669 | zgc:112176                                                                                                             | 748 | 193 |
| ENSDART00000103381 | similar to Ectonucleoside triphosphate diphosphohydrolase 5 precursor (NTPDase 5) (Nucleoside diphosphatase) (CD3      | 745 | 229 |
| ENSDART00000051114 | Rho-related BTB domain containing 2a                                                                                   | 744 | 218 |
| ENSDART00000103615 | ENSDARG00000070526                                                                                                     | 743 | 143 |
| ENSDART00000038257 | similar to Poly [ADP-ribose] polymerase-4 (PARP-4) (Vault poly(ADP-ribose) polymerase) (VPARP) (193-kDa vault prot     | 741 | 41  |
| ENSDART00000081899 | ENSDARG00000025168                                                                                                     | 738 | 198 |
| ENSDART00000103826 | fatty acid 2-hydroxylase                                                                                               | 736 | 41  |
| ENSDART00000086570 | tollold-like 1                                                                                                         | 734 | 216 |
| ENSDART00000086001 | similar to ADP-ribosylation factor-like 10                                                                             | 734 | 63  |
| ENSDART00000006840 | dynamin 1-like                                                                                                         | 724 | 212 |
| ENSDART00000083314 | si:dkey-21k10.1; similar to protein tyrosine phosphatase, receptor type, F                                             | 722 | 99  |
| ENSDART00000045882 | zgc:112153                                                                                                             | 714 | 172 |
| ENSDART00000055102 | ENSDARG00000037818                                                                                                     | 713 | 84  |
| ENSDART00000007744 | solute carrier family 30 (zinc transporter), member 1                                                                  | 711 | 183 |
| ENSDART00000065717 | similar to GDP/GTP exchange factor VAV2; VAV2                                                                          | 710 | 223 |
| ENSDART00000062902 | similar to paraxis                                                                                                     | 709 | 155 |
| ENSDART00000005518 | zgc:112270                                                                                                             | 708 | 222 |
| ENSDART00000056522 | ENSDARG00000023933                                                                                                     | 708 | 136 |
| ENSDART00000011705 | zgc:113062                                                                                                             | 707 | 210 |
| ENSDART00000010900 | hypothetical protein LOC100149839; zgc:136851                                                                          | 702 | 172 |
| ENSDART00000023797 | alkaline ceramidase 1                                                                                                  | 701 | 45  |
| ENSDART00000102827 | Lepre1 protein; similar to Prolyl 3-hydroxylase 1 precursor (Leucine- and proline-enriched proteoglycan 1) (Leprecan-  | 701 | 209 |
| ENSDART00000081544 | hypothetical LOC563976                                                                                                 | 701 | 125 |
| ENSDART00000066256 | hypothetical LOC791852; vesicle transport through interaction with t-SNAREs homolog 1A (yeast)                         | 697 | 162 |
| ENSDART00000003278 | similar to Neuromedin-K receptor (NKR) (Neurokinin B receptor) (NK-3 receptor) (NK-3R) (Tachykinin receptor 3)         | 696 | 215 |
| ENSDART00000114876 | zgc:171747                                                                                                             | 695 | 211 |
| ENSDART00000075940 | melatonin receptor type 1B a                                                                                           | 695 | 141 |
| ENSDART00000016310 | BTG3 associated nuclear protein                                                                                        | 694 | 87  |
| ENSDART00000039663 | membrane bound O-acyltransferase domain containing 2a                                                                  | 693 | 68  |
| ENSDART00000111003 | zona pellucida glycoprotein 3c                                                                                         | 693 | 81  |
| ENSDART00000103246 | hypothetical protein LOC553490                                                                                         | 693 | 35  |
| ENSDART00000092389 | similar to Nuclear pore membrane glycoprotein 210 precursor (POM210) (Nuclear pore protein gp210)                      | 689 | 184 |
| ENSDART00000111977 | ENSDARG00000077838                                                                                                     | 688 | 171 |
| ENSDART00000084249 | cylindromatosis (turban tumor syndrome)                                                                                | 684 | 54  |
| ENSDART00000105345 | ENSDARG00000071303                                                                                                     | 682 | 81  |
| ENSDART00000079859 | zgc:173729; serpin peptidase inhibitor, clade B (ovalbumin), member 1, like 4; serpin peptidase inhibitor, clade B (ov | 681 | 177 |
| ENSDART00000054817 | ENSDARG00000036009                                                                                                     | 681 | 66  |
| ENSDART00000021919 | fms-related tyrosine kinase 4                                                                                          | 680 | 225 |
| ENSDART00000052393 | par-6 partitioning defective 6 homolog gamma B (C. elegans)                                                            | 677 | 117 |
| ENSDART00000109675 | ENSDARG00000057212                                                                                                     | 677 | 89  |
| ENSDART00000104719 | si:dkey-204a24.6                                                                                                       | 676 | 34  |
| ENSDART00000065838 | similar to ectonucleoside triphosphate diphosphohydrolase 2 a.1                                                        | 675 | 166 |
| ENSDART00000021878 | similar to glucagon-like peptide 1 receptor                                                                            | 673 | 129 |
| ENSDART00000018213 | similar to natriuretic peptide receptor-A                                                                              | 662 | 193 |
| ENSDART00000004127 | sc:d0823; roundabout homolog 4                                                                                         | 660 | 162 |
| ENSDART00000066476 | ENSDARG00000053340                                                                                                     | 660 | 136 |
| ENSDART00000104555 | ENSDARG00000079243                                                                                                     | 658 | 180 |
| ENSDART00000005456 | similar to gdnf family receptor alpha 1b; gdnf family receptor alpha 1b                                                | 657 | 76  |
| ENSDART00000104070 | ENSDARG00000070697                                                                                                     | 656 | 152 |
| ENSDART00000099072 | ENSDARG00000068491                                                                                                     | 656 | 142 |
| ENSDART00000047008 | si:dkey-72l14.9                                                                                                        | 654 | 143 |
| ENSDART00000098097 | ENSDARG00000068007                                                                                                     | 653 | 54  |
| ENSDART00000111596 | similar to novel pim oncogene                                                                                          | 652 | 86  |
| ENSDART00000112494 | similar to hemicentin 1                                                                                                | 651 | 154 |
| ENSDART00000060666 | ENSDARG00000041382                                                                                                     | 649 | 180 |
| ENSDART00000111155 | ENSDARG00000078827                                                                                                     | 649 | 56  |
| ENSDART00000097683 | similar to interleukin-12 p35 subunit                                                                                  | 649 | 106 |
| ENSDART00000002690 | wu:fa97b06                                                                                                             | 643 | 49  |
| ENSDART00000103457 | zgc:136820; zgc:136545                                                                                                 | 642 | 138 |
| ENSDART00000016086 | wu:fb63a08                                                                                                             | 640 | 64  |
| ENSDART00000027443 | si:ch211-219a4.7                                                                                                       | 640 | 131 |
| ENSDART00000112188 | ENSDARG00000074872                                                                                                     | 639 | 203 |
| ENSDART00000059038 | ENSDARG00000040342                                                                                                     | 637 | 155 |

## Periderm-enriched profile

|                    |                                                                                                                     |     |     |
|--------------------|---------------------------------------------------------------------------------------------------------------------|-----|-----|
| ENSDART00000081030 | ENSDARG00000073670                                                                                                  | 637 | 157 |
| ENSDART00000059982 | similar to claudin 6                                                                                                | 636 | 188 |
| ENSDART00000057559 | si:dkeyp-1e8.1                                                                                                      | 636 | 48  |
| ENSDART00000099822 | nitric oxide synthase 1 (neuronal)                                                                                  | 635 | 141 |
| ENSDART00000007181 | similar to MGC82074 protein                                                                                         | 634 | 119 |
| ENSDART00000066593 | similar to Rsu1 protein; Ras suppressor protein 1                                                                   | 633 | 147 |
| ENSDART00000046933 | sulfotransferase family 1, cytosolic sulfotransferase 5                                                             | 633 | 67  |
| ENSDART00000100469 | MCM3 minichromosome maintenance deficient 3 ( <i>S. cerevisiae</i> ) associated protein                             | 633 | 149 |
| ENSDART00000105665 | ENSDARG00000071456                                                                                                  | 633 | 186 |
| ENSDART00000111274 | ENSDARG00000077210                                                                                                  | 632 | 210 |
| ENSDART00000078807 | zgc:123295                                                                                                          | 629 | 151 |
| ENSDART00000104262 | si:ch211-132n12.1                                                                                                   | 628 | 152 |
| ENSDART00000009438 | lamin B2                                                                                                            | 624 | 167 |
| ENSDART00000020813 | zgc:158411                                                                                                          | 623 | 132 |
| ENSDART00000085524 | zgc:158357                                                                                                          | 622 | 112 |
| ENSDART00000044838 | N-myc downstream regulated gene 1                                                                                   | 621 | 177 |
| ENSDART00000036037 | leucine rich repeat containing 4C                                                                                   | 620 | 206 |
| ENSDART00000038525 | novel protein similar to vertebrate solute carrier family 16 (monocarboxylic acid transporters), member 3 (SLC16A3) | 620 | 182 |
| ENSDART00000101709 | hypothetical LOC556274; si:xx-by187g17.5                                                                            | 619 | 80  |
| ENSDART00000106062 | ENSDARG00000071629                                                                                                  | 617 | 160 |
| ENSDART00000054977 | ATPase, Cu++ transporting, alpha polypeptide                                                                        | 613 | 62  |
| ENSDART00000092596 | ENSDARG00000063400                                                                                                  | 611 | 192 |
| ENSDART00000049646 | zgc:153457; si:dkey-13a21.14                                                                                        | 606 | 181 |
| ENSDART00000077955 | cholinergic receptor, muscarinic 2a                                                                                 | 602 | 112 |
| ENSDART00000100544 | similar to trace amine associated receptor 1; si:dkey-7c18.8                                                        | 602 | 190 |
| ENSDART00000083797 | ENSDARG00000043627                                                                                                  | 602 | 177 |
| ENSDART00000105800 | si:ch211-195b13.1                                                                                                   | 598 | 160 |
| ENSDART00000105300 | si:ch211-226h8.4; si:ch211-154a22.8; zgc:174165; hypothetical LOC566890; zgc:171717; si:ch211-226h8.11; simi        | 597 | 177 |
| ENSDART00000097535 | ENSDARG00000067720                                                                                                  | 593 | 148 |
| ENSDART00000038813 | zinc finger protein 143                                                                                             | 593 | 138 |
| ENSDART00000111393 | si:dkey-19p15.7                                                                                                     | 593 | 135 |
| ENSDART00000010537 | ceruloplasmin                                                                                                       | 593 | 35  |
| ENSDART00000044708 | polymerase (RNA) I polypeptide A                                                                                    | 593 | 179 |
| ENSDART00000015576 | zgc:56372                                                                                                           | 591 | 117 |
| ENSDART00000057872 | zgc:112433                                                                                                          | 591 | 57  |
| ENSDART00000060530 | ENSDARG000000041297                                                                                                 | 589 | 105 |
| ENSDART00000100173 | zgc:66385                                                                                                           | 588 | 150 |
| ENSDART00000103889 | similar to LOC494811 protein                                                                                        | 587 | 171 |
| ENSDART00000054337 | G protein-coupled receptor 157                                                                                      | 585 | 177 |
| ENSDART00000053841 | si:dkey-63j12.5                                                                                                     | 585 | 97  |
| ENSDART00000087111 | si:ch211-175f1.2                                                                                                    | 580 | 113 |
| ENSDART00000083068 | Malectin                                                                                                            | 580 | 150 |
| ENSDART00000110010 | WD repeat domain 24                                                                                                 | 580 | 104 |
| ENSDART00000047208 | similar to MAP-kinase activating death domain-containing protein                                                    | 580 | 75  |
| ENSDART00000026207 | si:dkey-48h7.2                                                                                                      | 578 | 147 |
| ENSDART00000101280 | si:dkey-30c15.10                                                                                                    | 577 | 182 |
| ENSDART00000064848 | similar to PGRP-SC1a protein; peptidoglycan recognition protein 5                                                   | 577 | 32  |
| ENSDART00000063937 | similar to LOC496799 protein                                                                                        | 576 | 118 |
| ENSDART00000089750 | zgc:162623                                                                                                          | 575 | 137 |
| ENSDART00000064613 | lysyl oxidase-like 2b; lysyl oxidase-like 2a                                                                        | 574 | 118 |
| ENSDART00000031665 | annexin A1a                                                                                                         | 574 | 172 |
| ENSDART00000103070 | si:dkey-31k5.1; hypothetical protein LOC798487                                                                      | 573 | 147 |
| ENSDART00000074268 | zgc:153929                                                                                                          | 566 | 159 |
| ENSDART00000036463 | dead end                                                                                                            | 565 | 108 |
| ENSDART00000087841 | ENSDARG00000061535                                                                                                  | 565 | 147 |
| ENSDART00000076494 | zgc:194470                                                                                                          | 564 | 148 |
| ENSDART00000093371 | similar to NEDD4-like ubiquitin-protein ligase 1                                                                    | 563 | 94  |
| ENSDART00000024751 | zgc:113191                                                                                                          | 563 | 98  |
| ENSDART00000087292 | similar to PR domain containing 10; PR domain containing 10                                                         | 562 | 113 |
| ENSDART00000110658 | zgc:162229                                                                                                          | 562 | 185 |
| ENSDART00000075856 | hypothetical protein LOC10006655                                                                                    | 562 | 31  |
| ENSDART00000098671 | si:ch211-203b8.6                                                                                                    | 562 | 143 |
| ENSDART00000101825 | hypothetical LOC795419                                                                                              | 560 | 129 |
| ENSDART00000066206 | wu:fj49c01                                                                                                          | 559 | 140 |
| ENSDART00000112579 | zgc:153925                                                                                                          | 558 | 77  |
| ENSDART00000002777 | rho-associated, coiled-coil containing protein kinase 2b                                                            | 558 | 171 |
| ENSDART00000092705 | similar to novel immunoglobulin domain containing protein                                                           | 556 | 143 |
| ENSDART00000044738 | similar to synembryn; zgc:92294                                                                                     | 554 | 125 |
| ENSDART00000079439 | ENSDARG00000056863; ENSDARG00000045577                                                                              | 554 | 141 |
| ENSDART00000011946 | similar to GABA receptor rho-1 subunit                                                                              | 553 | 147 |
| ENSDART00000039851 | dopamine receptor D3; hypothetical protein LOC100150956                                                             | 551 | 119 |
| ENSDART00000034714 | similar to CCR4-NOT transcription complex, subunit 4                                                                | 551 | 135 |
| ENSDART00000015482 | malic enzyme 2, NAD(+)-dependent, mitochondrial                                                                     | 551 | 165 |
| ENSDART00000098987 | zgc:92349                                                                                                           | 550 | 123 |
| ENSDART00000003156 | wingless-type MMTV integration site family, member 7Ba                                                              | 550 | 151 |
| ENSDART00000076079 | ENSDARG00000053958                                                                                                  | 548 | 103 |
| ENSDART00000100283 | aldehyde dehydrogenase 9 family, member A1a                                                                         | 548 | 147 |
| ENSDART00000061414 | hypothetical protein LOC793774                                                                                      | 547 | 116 |
| ENSDART00000075123 | Purkinje cell protein 4a                                                                                            | 546 | 86  |
| ENSDART00000030873 | hypothetical LOC791461; zgc:56067                                                                                   | 544 | 156 |
| ENSDART00000083946 | zgc:162591                                                                                                          | 544 | 110 |
| ENSDART00000084037 | ENSDARG00000069893                                                                                                  | 543 | 138 |
| ENSDART00000038657 | zgc:55420                                                                                                           | 541 | 89  |
| ENSDART00000100184 | activated leukocyte cell adhesion molecule                                                                          | 540 | 144 |
| ENSDART00000017368 | similar to membrane-spanning 4-domains, subfamily A, member 4                                                       | 540 | 53  |
| ENSDART00000098296 | zgc:56324; hypothetical LOC796503                                                                                   | 538 | 145 |
| ENSDART00000020598 | wu:fc51c09                                                                                                          | 538 | 86  |
| ENSDART00000074761 | zgc:110105                                                                                                          | 538 | 135 |
| ENSDART00000061500 | similar to Golgin subfamily A member 4 (Trans-Golgi p230) (256 kDa golgin) (Golgin-245) (Protein 72.1); si:dkey-163 | 538 | 131 |
| ENSDART00000057553 | si:dkey-24l11.8                                                                                                     | 536 | 91  |
| ENSDART00000102071 | zgc:171978                                                                                                          | 536 | 117 |
| ENSDART00000052514 | cysteinyl-tRNA synthetase                                                                                           | 534 | 150 |
| ENSDART00000029946 | hypothetical LOC792161; zgc:100921                                                                                  | 533 | 98  |
| ENSDART00000026768 | bone morphogenetic protein receptor, type 1a                                                                        | 533 | 138 |
| ENSDART00000104545 | ENSDARG00000029219                                                                                                  | 530 | 143 |
| ENSDART00000100342 | ankyrin and armadillo repeat containing                                                                             | 529 | 94  |
| ENSDART00000098597 | si:dkeyp-86e4.1                                                                                                     | 528 | 144 |

Periderm-enriched profile

|                     |                                                                                                                        |     |     |
|---------------------|------------------------------------------------------------------------------------------------------------------------|-----|-----|
| ENSDART00000048391  | v-raf murine sarcoma viral oncogene homolog B1                                                                         | 526 | 152 |
| ENSDART00000055251  | immunoglobulin heavy constant mu                                                                                       | 525 | 152 |
| ENSDART00000006183  | zinc finger protein 385B; similar to Zinc finger protein 533                                                           | 524 | 141 |
| ENSDART000000101888 | ENSDARG00000069806                                                                                                     | 524 | 169 |
| ENSDART00000050831  | ChaC, cation transport regulator homolog 2 (E. coli)                                                                   | 524 | 130 |
| ENSDART00000079226  | cytoplasmic polyadenylation element binding protein 4                                                                  | 523 | 172 |
| ENSDART00000050352  | similar to hyperpolarization activated cyclic nucleotide-gated potassium channel 2                                     | 522 | 68  |
| ENSDART00000020550  | ubiquitin-conjugating enzyme E2E 3 (UBC4/5 homolog, yeast)                                                             | 521 | 130 |
| ENSDART00000048003  | tetraspanin 12                                                                                                         | 521 | 119 |
| ENSDART000000109475 | ENSDARG00000078597                                                                                                     | 521 | 71  |
| ENSDART000000101885 | zinc finger, DHHC-type containing 18                                                                                   | 519 | 166 |
| ENSDART00000003879  | zgc:101060                                                                                                             | 519 | 116 |
| ENSDART000000019136 | lyric-like                                                                                                             | 519 | 111 |
| ENSDART000000103526 | similar to hCG2024326                                                                                                  | 518 | 111 |
| ENSDART000000001102 | si:ch211-214d15.1                                                                                                      | 517 | 60  |
| ENSDART000000061321 | hypothetical protein LOC553532; similar to LOC553532 protein                                                           | 516 | 132 |
| ENSDART000000060258 | hypothetical LOC791972; zgc:103671                                                                                     | 513 | 144 |
| ENSDART000000112453 | phosphoinositide kinase, FYVE finger containing                                                                        | 511 | 153 |
| ENSDART000000101061 | ENSDARG00000069434                                                                                                     | 510 | 85  |
| ENSDART00000098009  | similar to TBC1 domain family, member 22B                                                                              | 508 | 62  |
| ENSDART000000113824 | hepatoma-derived growth factor, related protein 2                                                                      | 507 | 49  |
| ENSDART000000047248 | nemo like kinase, type 2                                                                                               | 505 | 136 |
| ENSDART000000110448 | ENSDARG00000079792                                                                                                     | 504 | 99  |
| ENSDART00000082228  | leucine rich repeat containing 8 family, member A; similar to leucine rich repeat containing 8 family, member A        | 504 | 63  |
| ENSDART000000012697 | hypothetical LOC566620; si:ch211-125e6.14; si:ch211-125e6.12                                                           | 502 | 53  |
| ENSDART000000066782 | guanine nucleotide binding protein (G protein), alpha activating activity polypeptide, olfactory type                  | 501 | 137 |
| ENSDART000000029175 | ENSDARG00000015356                                                                                                     | 500 | 157 |
| ENSDART00000082187  | novel protein similar to vertebrate Ras-related GTP binding C (RRAGC)                                                  | 500 | 133 |
| ENSDART000000021158 | ArfGAP with FG repeats 1b                                                                                              | 498 | 146 |
| ENSDART000000078734 | sb:cb37; similar to Alpha-2-macroglobulin precursor (Alpha-2-M); alpha-2 macroglobulin-like                            | 497 | 57  |
| ENSDART000000040449 | similar to 5-hydroxytryptamine (serotonin) receptor 1F                                                                 | 495 | 47  |
| ENSDART000000063180 | ATP-binding cassette, sub-family G (WHITE), member 2a                                                                  | 495 | 147 |
| ENSDART000000089211 | ENSDARG00000057353                                                                                                     | 494 | 49  |
| ENSDART000000062740 | zgc:158252                                                                                                             | 494 | 125 |
| ENSDART000000064436 | mitogen-activated protein kinase kinase kinase 7 interacting protein 2                                                 | 493 | 132 |
| ENSDART000000079413 | ENSDARG00000056896                                                                                                     | 493 | 145 |
| ENSDART00000039848  | wu:fk66a11                                                                                                             | 491 | 71  |
| ENSDART000000057327 | similar to Voltage-dependent calcium channel gamma-5 subunit (Neuronal voltage-gated calcium channel gamma-5 subunit)  | 490 | 138 |
| ENSDART000000101207 | ENSDARG00000069499                                                                                                     | 490 | 106 |
| ENSDART000000006961 | si:ch211-152c2.4                                                                                                       | 490 | 61  |
| ENSDART000000108931 | ENSDARG00000074420                                                                                                     | 488 | 140 |
| ENSDART000000053639 | glycerol-3-phosphate dehydrogenase 1 (soluble)                                                                         | 487 | 141 |
| ENSDART000000016894 | similar to endothelial differentiation, lysophosphatidic acid G-protein-coupled receptor 7                             | 487 | 127 |
| ENSDART000000000198 | si:rp71-1n7.1                                                                                                          | 487 | 44  |
| ENSDART000000104915 | wingless-type MMTV integration site family, member 7Bb                                                                 | 485 | 139 |
| ENSDART000000035702 | ENSDARG00000021611                                                                                                     | 483 | 47  |
| ENSDART000000103320 | delta-like 4 (Drosophila)                                                                                              | 483 | 133 |
| ENSDART000000057736 | complement component 8, beta polypeptide                                                                               | 483 | 53  |
| ENSDART000000081233 | similar to cut-like homeobox 2                                                                                         | 482 | 133 |
| ENSDART000000087441 | similar to Glucose-fructose oxidoreductase domain-containing protein 1                                                 | 482 | 75  |
| ENSDART000000075627 | novel protein similar to LAG1 homolog, ceramide synthase family                                                        | 481 | 144 |
| ENSDART000000104203 | zgc:92035                                                                                                              | 481 | 32  |
| ENSDART000000043479 | si:dkey-21e2.15; similar to Natural killer cell protease 1 precursor (RNKP-1) (Granzyme B); similar to Granzyme-like 1 | 480 | 101 |
| ENSDART000000112349 | phospholipase C, delta 1a                                                                                              | 480 | 33  |
| ENSDART000000077745 | zona pellucida glycoprotein 2, like 1                                                                                  | 480 | 104 |
| ENSDART000000098368 | novel protein similar to mucosa associated lymphoid tissue lymphoma translocation gene 1 (malt1)                       | 480 | 93  |
| ENSDART000000113670 | cell adhesion molecule 1a                                                                                              | 480 | 76  |
| ENSDART000000067134 | methionine sulfoxide reductase B3                                                                                      | 480 | 85  |
| ENSDART000000034849 | glutamate receptor, ionotropic, N-methyl D-aspartate 1b                                                                | 479 | 115 |
| ENSDART000000016181 | N-myc downstream regulated family member 3a                                                                            | 478 | 147 |
| ENSDART000000104343 | phosphodiesterase 10A                                                                                                  | 477 | 89  |
| ENSDART000000079457 | zgc:162722                                                                                                             | 477 | 112 |
| ENSDART000000075432 | similar to KIAA0239                                                                                                    | 476 | 130 |
| ENSDART000000047740 | WD repeat domain 32                                                                                                    | 476 | 137 |
| ENSDART000000083554 | calcium/calmodulin-dependent serine protein kinase b; calcium/calmodulin-dependent serine protein kinase               | 476 | 109 |
| ENSDART000000085512 | hypothetical LOC561164                                                                                                 | 475 | 38  |
| ENSDART000000103253 | bone morphogenetic protein 8                                                                                           | 475 | 137 |
| ENSDART000000082325 | zgc:85939                                                                                                              | 474 | 91  |
| ENSDART000000080005 | integrin, beta 5                                                                                                       | 474 | 124 |
| ENSDART000000002233 | ENSDARG00000016923                                                                                                     | 473 | 35  |
| ENSDART000000079322 | ENSDARG00000056781                                                                                                     | 472 | 96  |
| ENSDART000000023794 | thymidine kinase 1, soluble                                                                                            | 472 | 78  |
| ENSDART000000108888 | ENSDARG00000060980                                                                                                     | 472 | 53  |
| ENSDART000000054877 | fibroblast growth factor 24                                                                                            | 471 | 63  |
| ENSDART000000081823 | similar to Fbxw17 protein; zgc:171857                                                                                  | 470 | 65  |
| ENSDART000000003698 | ENSDARG00000008350                                                                                                     | 469 | 138 |
| ENSDART000000051694 | exostoses (multiple) 1c                                                                                                | 468 | 88  |
| ENSDART000000063264 | hypothetical LOC100005862; zgc:136911                                                                                  | 468 | 35  |
| ENSDART000000074385 | similar to Anionic trypsin-1 precursor (Anionic trypsin I) (Pretrypsinogen I) (Serine protease 1)                      | 467 | 133 |
| ENSDART000000101004 | novel collagen protein                                                                                                 | 466 | 75  |
| ENSDART000000111788 | ENSDARG00000074427                                                                                                     | 465 | 84  |
| ENSDART000000080338 | zgc:101746                                                                                                             | 465 | 154 |
| ENSDART000000058418 | similar to GTPase, IMAP family member 8                                                                                | 464 | 37  |
| ENSDART000000104659 | secretion regulating guanine nucleotide exchange factor; similar to Sergef protein                                     | 464 | 120 |
| ENSDART000000090907 | novel protein similar to vertebrate diacylglycerol kinase, beta 90kDa (DGKB)                                           | 464 | 129 |
| ENSDART000000053426 | profilin 2 like                                                                                                        | 462 | 86  |
| ENSDART000000084553 | similar to guanine nucleotide exchange factor p532                                                                     | 462 | 77  |
| ENSDART000000089543 | similar to ABI gene family, member 3 (NESH) binding protein                                                            | 462 | 62  |
| ENSDART000000031195 | zgc:112352                                                                                                             | 461 | 120 |
| ENSDART000000114726 | ENSDARG000000059784                                                                                                    | 460 | 77  |
| ENSDART000000067764 | zgc:158623                                                                                                             | 460 | 55  |
| ENSDART000000021916 | similar to UII beta precursor; urotensin 2, beta                                                                       | 460 | 93  |
| ENSDART000000105597 | si:ch211-129c2.1                                                                                                       | 459 | 137 |
| ENSDART000000098911 | hypothetical LOC561486; si:ch211-181p1.2                                                                               | 459 | 102 |
| ENSDART000000088293 | si:dkey-149j18.1                                                                                                       | 458 | 67  |
| ENSDART000000064958 | ENSDARG00000013570                                                                                                     | 457 | 87  |
| ENSDART000000103934 | tocopherol (alpha) transfer protein-like                                                                               | 457 | 133 |

Periderm-enriched profile

|                    |                                                                                                                         |     |     |
|--------------------|-------------------------------------------------------------------------------------------------------------------------|-----|-----|
| ENSDART00000101026 | flavoprotein oxidoreductase MICAL3                                                                                      | 456 | 135 |
| ENSDART00000104453 | similar to prostatin                                                                                                    | 456 | 129 |
| ENSDART00000113572 | ENSDARG00000074227                                                                                                      | 456 | 104 |
| ENSDART00000078065 | coagulation factor V                                                                                                    | 456 | 128 |
| ENSDART00000101030 | similar to adenylate cyclase 9; novel protein similar to H.sapiens ACDY9, adenylate cyclase 9 (ACDY9)                   | 456 | 102 |
| ENSDART00000075331 | insulinoma-associated 1b                                                                                                | 455 | 122 |
| ENSDART00000106025 | hypothetical protein FLJ11011-like (H. sapiens)                                                                         | 455 | 137 |
| ENSDART00000026292 | tubulin, alpha 7 like                                                                                                   | 454 | 111 |
| ENSDART00000100699 | BCL2 binding component 3                                                                                                | 454 | 121 |
| ENSDART00000066587 | similar to kelch-like 14                                                                                                | 454 | 102 |
| ENSDART00000078163 | transmembrane protein 115                                                                                               | 453 | 67  |
| ENSDART00000110901 | receptor-interacting serine-threonine kinase 2                                                                          | 452 | 135 |
| ENSDART00000091397 | si:ch211-155m12.3                                                                                                       | 451 | 53  |
| ENSDART00000112593 | ENSDARG00000079545                                                                                                      | 451 | 88  |
| ENSDART00000081743 | G protein-coupled receptor kinase 1 a                                                                                   | 449 | 87  |
| ENSDART00000102708 | similar to nuclear transcription factor Y, gamma; nuclear transcription factor Y, gamma; si:ch211-13c6.2; si:ch211-13   | 449 | 106 |
| ENSDART00000064387 | similar to Prolyl endopeptidase (Post-proline cleaving enzyme) (PE)                                                     | 449 | 125 |
| ENSDART00000051724 | ENSDARG00000061081                                                                                                      | 448 | 81  |
| ENSDART00000097991 | fem-1 homolog a (C. elegans)                                                                                            | 448 | 81  |
| ENSDART00000114137 | sb:cb1095                                                                                                               | 447 | 48  |
| ENSDART00000067836 | similar to Proteinase-activated receptor 3 precursor (PAR-3) (Thrombin receptor-like 2) (Coagulation factor II receptor | 447 | 69  |
| ENSDART00000042040 | ATPase, Ca++ transporting, cardiac muscle, slow twitch 2a                                                               | 447 | 124 |
| ENSDART00000104505 | dual specificity phosphatase 7                                                                                          | 446 | 119 |
| ENSDART00000013581 | HSPC049 protein-like                                                                                                    | 445 | 59  |
| ENSDART00000016475 | similar to LOC515212 protein                                                                                            | 444 | 78  |
| ENSDART00000066949 | FYVE, RhoGEF and PH domain containing 6                                                                                 | 444 | 56  |
| ENSDART00000050303 | beta-1,3-glucuronyltransferase 2 (glucuronosyltransferase 5)                                                            | 443 | 67  |
| ENSDART00000019785 | similar to Amine sulfotransferase (Sulfotransferase 3A1) (SULT-X2)                                                      | 443 | 45  |
| ENSDART00000062841 | ENSDARG00000004633                                                                                                      | 442 | 94  |
| ENSDART00000056750 | ENSDARG00000031658                                                                                                      | 442 | 124 |
| ENSDART00000060011 | oligodendrocyte lineage transcription factor 1                                                                          | 442 | 105 |
| ENSDART00000021204 | ENSDARG00000059202                                                                                                      | 441 | 127 |
| ENSDART00000051232 | ENSDARG00000035358                                                                                                      | 441 | 127 |
| ENSDART00000044282 | similar to hypoxia-inducible factor 1 alpha                                                                             | 440 | 115 |
| ENSDART00000092500 | serum/glucocorticoid regulated kinase 2                                                                                 | 439 | 96  |
| ENSDART00000051229 | si:ch211-284e13.2                                                                                                       | 439 | 110 |
| ENSDART00000113076 | ENSDARG00000026613                                                                                                      | 439 | 132 |
| ENSDART00000073689 | ENSDARG00000051965                                                                                                      | 438 | 120 |
| ENSDART00000039988 | Ewing sarcoma breakpoint region 1b                                                                                      | 437 | 138 |
| ENSDART00000050037 | cholinergic receptor, nicotinic, beta polypeptide 3b                                                                    | 437 | 122 |
| ENSDART00000046098 | phospholipase C, delta 1b                                                                                               | 436 | 89  |
| ENSDART00000002728 | eukaryotic translation initiation factor 4E nuclear import factor 1                                                     | 435 | 73  |
| ENSDART00000082469 | zgc:91960                                                                                                               | 434 | 69  |
| ENSDART00000100500 | mycbp associated protein                                                                                                | 434 | 125 |
| ENSDART00000067353 | similar to Casitas B-lineage lymphoma-like 1                                                                            | 434 | 62  |
| ENSDART00000022481 | methylcrotonoyl-Coenzyme A carboxylase 2 (beta)                                                                         | 432 | 97  |
| ENSDART00000056804 | ENSDARG00000038912                                                                                                      | 432 | 111 |
| ENSDART00000013063 | novel protein similar to vertebrate DEAH (Asp-Glu-Ala-His) box polypeptide 33 (DHX33)                                   | 432 | 92  |
| ENSDART00000018348 | similar to 5-hydroxytryptamine receptor 1E (5-HT-1E) (Serotonin receptor 1E) (5-HT1E)                                   | 431 | 117 |
| ENSDART00000110705 | similar to Transmembrane protein C6orf137                                                                               | 431 | 115 |
| ENSDART00000083100 | similar to solute carrier organic anion transporter family, member 3A1                                                  | 431 | 124 |
| ENSDART00000082453 | cadherin, EGF LAG seven-pass G-type receptor 2                                                                          | 431 | 41  |
| ENSDART00000111275 | ENSDARG00000077496                                                                                                      | 431 | 99  |
| ENSDART00000104629 | furin-like; furin (paired basic amino acid cleaving enzyme) b                                                           | 431 | 127 |
| ENSDART00000113606 | ENSDARG00000076159                                                                                                      | 429 | 89  |
| ENSDART00000092729 | wingless-type MMTV integration site family, member 9A                                                                   | 429 | 135 |
| ENSDART00000033844 | ENSDARG00000021720                                                                                                      | 427 | 131 |
| ENSDART00000104921 | similar to NLR family, CARD domain containing 3                                                                         | 427 | 61  |
| ENSDART00000074097 | hypothetical protein LOC553473                                                                                          | 426 | 49  |
| ENSDART00000062885 | oxytocin-like                                                                                                           | 425 | 91  |
| ENSDART00000089207 | CDK5 and ABL1 enzyme substrate 1                                                                                        | 425 | 126 |
| ENSDART00000074189 | similar to cathepsin Z cysteine protease                                                                                | 425 | 139 |
| ENSDART00000047503 | ubiquitin specific peptidase 36                                                                                         | 424 | 113 |
| ENSDART00000088177 | zgc:158271                                                                                                              | 423 | 99  |
| ENSDART00000105241 | neurotrophin 7                                                                                                          | 423 | 97  |
| ENSDART00000066946 | transmembrane and coiled-coil domain family 3                                                                           | 422 | 133 |
| ENSDART00000100798 | ENSDARG00000069331                                                                                                      | 421 | 87  |
| ENSDART00000099044 | ENSDARG00000068468                                                                                                      | 421 | 102 |
| ENSDART00000108541 | ENSDARG00000075545                                                                                                      | 421 | 118 |
| ENSDART00000053571 | zgc:100911                                                                                                              | 420 | 119 |
| ENSDART00000064603 | phosphatidic acid phosphatase type 2 domain containing 1B                                                               | 420 | 77  |
| ENSDART00000011893 | guanine nucleotide binding protein (G protein), alpha activating activity polypeptide O, a                              | 420 | 96  |
| ENSDART00000104716 | amiloride-sensitive cation channel 4 b                                                                                  | 419 | 102 |
| ENSDART00000092579 | similar to zinc finger protein 462                                                                                      | 419 | 81  |
| ENSDART00000102548 | ENSDARG00000070073                                                                                                      | 417 | 133 |
| ENSDART00000035428 | hydroxyacid oxidase 2 (long chain); hypothetical protein LOC100147958                                                   | 417 | 49  |
| ENSDART00000062421 | ring finger protein 144ab                                                                                               | 416 | 77  |
| ENSDART00000088569 | nyctalopin                                                                                                              | 416 | 81  |
| ENSDART00000041677 | serine (or cysteine) proteinase inhibitor, clade E (nexin, plasminogen activator inhibitor type 1), member 2; zgc:15860 | 415 | 118 |
| ENSDART00000003775 | similar to rCG55704                                                                                                     | 415 | 95  |
| ENSDART00000074638 | similar to ankyrin repeat domain 11; zgc:113046                                                                         | 415 | 51  |
| ENSDART00000106367 | hypothetical protein LOC100006474; hypothetical LOC792855; zgc:171318; similar to Zinc finger protein 658; zgc:16       | 415 | 136 |
| ENSDART00000090334 | si:dkey-246a16.3                                                                                                        | 415 | 123 |
| ENSDART00000110411 | zgc:162213; similar to ceramide kinase-like protein                                                                     | 414 | 127 |
| ENSDART00000103350 | numb homolog (Drosophila)                                                                                               | 414 | 68  |
| ENSDART00000101753 | ENSDARG00000069755                                                                                                      | 414 | 127 |
| ENSDART00000112574 | ENSDARG00000074464                                                                                                      | 414 | 96  |
| ENSDART00000085888 | similar to tripartite motif-containing 8; si:ch211-208d15.5                                                             | 414 | 77  |
| ENSDART00000100630 | si:ch73-131e21.7                                                                                                        | 413 | 86  |
| ENSDART00000046394 | si:dkey-21e2.15; similar to Natural killer cell protease 1 precursor (RNKP-1) (Granzyme B); similar to Granzyme-like 1  | 413 | 94  |
| ENSDART00000090079 | si:dkey-25f3.3                                                                                                          | 413 | 91  |
| ENSDART00000081490 | similar to thyrotropin-releasing hormone receptor 3                                                                     | 410 | 96  |
| ENSDART00000065006 | WD repeat domain containing 82                                                                                          | 410 | 102 |
| ENSDART00000114544 | hypothetical LOC559027                                                                                                  | 408 | 91  |
| ENSDART00000055779 | zgc:92115                                                                                                               | 408 | 135 |
| ENSDART00000053871 | desert hedgehog                                                                                                         | 408 | 72  |
| ENSDART00000063512 | tumor necrosis factor, alpha-induced protein 8                                                                          | 408 | 111 |

Periderm-enriched profile

|                    |                                                                                                                       |     |     |
|--------------------|-----------------------------------------------------------------------------------------------------------------------|-----|-----|
| ENSDART00000081949 | LATS, large tumor suppressor, homolog 1 (Drosophila)                                                                  | 408 | 95  |
| ENSDART00000035676 | BCL2/adenovirus E1B interacting protein 3-like, 2                                                                     | 408 | 132 |
| ENSDART00000019353 | zgc:91887                                                                                                             | 408 | 30  |
| ENSDART00000091597 | similar to Integrin alpha-2 precursor (Platelet membrane glycoprotein Ia) (GPIa) (Collagen receptor) (VLA-2 alpha cha | 407 | 90  |
| ENSDART00000108906 | ENSDARG00000078041                                                                                                    | 407 | 103 |
| ENSDART00000033630 | novel protein similar to vertebrate oxysterol binding protein (OSBP)                                                  | 406 | 103 |
| ENSDART00000090346 | similar to GPI inositol-deacylase (Post-GPI attachment to proteins factor 1)                                          | 405 | 74  |
| ENSDART00000097473 | wu:fi18h02                                                                                                            | 405 | 79  |
| ENSDART00000077439 | similar to potassium channel, subfamily K, member 2                                                                   | 405 | 57  |
| ENSDART00000087823 | novel protein similar to vertebrate adenylate cyclase 8 (brain) (ADCY8)                                               | 403 | 81  |
| ENSDART00000003907 | similar to putative odorant receptor; similar to vomeronasal 2, receptor, 2-like 3                                    | 403 | 104 |
| ENSDART00000045866 | si:dkey-31f5.7                                                                                                        | 403 | 111 |
| ENSDART00000045639 | si:dkey-202b22.4                                                                                                      | 402 | 75  |
| ENSDART00000114609 | similar to CUB domain containing protein 2                                                                            | 402 | 82  |
| ENSDART00000045303 | si:ch211-231a1.6                                                                                                      | 402 | 120 |
| ENSDART00000033386 | zgc:113651                                                                                                            | 401 | 67  |
| ENSDART00000098401 | zgc:153398                                                                                                            | 401 | 47  |
| ENSDART00000091360 | zgc:158393                                                                                                            | 401 | 89  |
| ENSDART00000032992 | similar to arylsulfatase D                                                                                            | 401 | 82  |
| ENSDART00000090280 | zgc:153901                                                                                                            | 401 | 112 |
| ENSDART00000115082 | zgc:194839                                                                                                            | 401 | 58  |
| ENSDART00000040147 | mitogen-activated protein kinase 14b                                                                                  | 401 | 112 |
| ENSDART00000057067 | tyrosinase                                                                                                            | 400 | 87  |
| ENSDART00000052078 | similar to Dre1 protein                                                                                               | 400 | 106 |
| ENSDART00000103347 | similar to Probable ergosterol biosynthetic protein 28                                                                | 400 | 132 |
| ENSDART00000109588 | retinol binding protein 4, plasma                                                                                     | 400 | 112 |
| ENSDART00000065012 | ENSDARG00000021982                                                                                                    | 399 | 92  |
| ENSDART00000061413 | si:ch211-245h14.2                                                                                                     | 399 | 98  |
| ENSDART00000032246 | ENSDARG00000023236                                                                                                    | 399 | 108 |
| ENSDART00000080969 | tripartite motif-containing 55b                                                                                       | 398 | 113 |
| ENSDART00000078795 | S-adenosylhomocysteine hydrolase-like 1                                                                               | 398 | 95  |
| ENSDART00000056536 | telomerase-associated protein 1                                                                                       | 398 | 82  |
| ENSDART00000034619 | ENSDARG00000056757                                                                                                    | 397 | 61  |
| ENSDART00000042501 | similar to 5-hydroxytryptamine 1D receptor; 5-hydroxytryptamine (serotonin) receptor 1bd                              | 397 | 106 |
| ENSDART00000040704 | similar to KARP-1-binding protein 1 (KAB1)                                                                            | 397 | 86  |
| ENSDART00000080426 | transformed 3T3 cell double minute 1 homolog (mouse)                                                                  | 397 | 59  |
| ENSDART00000100097 | dehydrogenase/reductase (SDR family) member 11a                                                                       | 397 | 123 |
| ENSDART00000012580 | similar to norepinephrine transporter                                                                                 | 396 | 117 |
| ENSDART00000053878 | IKAROS family zinc finger 4                                                                                           | 396 | 52  |
| ENSDART00000093365 | ENSDARG00000069765                                                                                                    | 396 | 103 |
| ENSDART00000092787 | RAB43, member RAS oncogene family; zgc:153726                                                                         | 396 | 131 |
| ENSDART00000101707 | similar to DEAH (Asp-Glu-Ala-His) box polypeptide 40                                                                  | 395 | 127 |
| ENSDART00000099570 | hypothetical protein LOC795590                                                                                        | 395 | 65  |
| ENSDART00000085087 | zgc:153386                                                                                                            | 394 | 114 |
| ENSDART00000078049 | zgc:194812                                                                                                            | 394 | 50  |
| ENSDART00000102322 | si:dkey-114f6.1                                                                                                       | 394 | 110 |
| ENSDART00000078245 | similar to Kv3.3 potassium channel subunit                                                                            | 394 | 67  |
| ENSDART00000108685 | si:ch211-250e5.16                                                                                                     | 394 | 40  |
| ENSDART00000098691 | zgc:114095                                                                                                            | 393 | 109 |
| ENSDART00000045433 | eyes absent homolog 4 (Drosophila)                                                                                    | 393 | 131 |
| ENSDART00000088208 | ENSDARG00000029146                                                                                                    | 393 | 82  |
| ENSDART00000016887 | si:dkey-183c2.4; si:ch211-127b11.1                                                                                    | 393 | 98  |
| ENSDART00000085678 | ENSDARG00000041304                                                                                                    | 392 | 101 |
| ENSDART00000102003 | similar to Tyrosine-protein kinase Tec                                                                                | 391 | 72  |
| ENSDART00000078399 | novel protein similar to vertebrate granzyme family                                                                   | 390 | 88  |
| ENSDART00000078767 | ENSDARG00000009217                                                                                                    | 390 | 80  |
| ENSDART00000082012 | si:ch211-39e15.2                                                                                                      | 390 | 109 |
| ENSDART00000046599 | im:7158796                                                                                                            | 390 | 101 |
| ENSDART00000099748 | hypothetical protein LOC100149617; nucleosome assembly protein 1-like 4b                                              | 389 | 109 |
| ENSDART00000112398 | trk-fused gene                                                                                                        | 388 | 98  |
| ENSDART00000111361 | ENSDARG00000079218                                                                                                    | 388 | 46  |
| ENSDART00000087610 | similar to Rho guanine nucleotide exchange factor 12 (Leukemia-associated RhoGEF)                                     | 387 | 104 |
| ENSDART00000076469 | similar to adaptor-related protein complex 2, alpha 1 subunit                                                         | 386 | 62  |
| ENSDART00000089030 | myosin VB                                                                                                             | 386 | 102 |
| ENSDART00000051622 | melatonin receptor 1C                                                                                                 | 385 | 127 |
| ENSDART00000007247 | occludin b                                                                                                            | 385 | 98  |
| ENSDART00000049252 | hypothetical protein LOC100147959; zgc:109967                                                                         | 384 | 116 |
| ENSDART00000059179 | ENSDARG00000040430                                                                                                    | 384 | 67  |
| ENSDART00000076481 | im:7147183                                                                                                            | 384 | 77  |
| ENSDART00000099870 | cytochrome P450, family 1, subfamily B, polypeptide 1                                                                 | 384 | 75  |
| ENSDART00000047834 | neuroblastoma amplified sequence                                                                                      | 384 | 72  |
| ENSDART00000085724 | ENSDARG00000060675                                                                                                    | 384 | 88  |
| ENSDART00000080490 | similar to peroxidase                                                                                                 | 384 | 107 |
| ENSDART00000081510 | zgc:92761                                                                                                             | 384 | 118 |
| ENSDART00000042259 | citrate lyase beta-like                                                                                               | 384 | 96  |
| ENSDART00000032212 | similar to Tyrosine-protein kinase FRK (FYN-related kinase) (Nuclear tyrosine protein kinase RAK)                     | 383 | 89  |
| ENSDART00000087118 | similar to protein-O-xylosyltransferase IB                                                                            | 382 | 81  |
| ENSDART00000100020 | groucho 1                                                                                                             | 382 | 90  |
| ENSDART00000081220 | si:rp71-1f1.8                                                                                                         | 382 | 91  |
| ENSDART00000074199 | similar to calcium channel, voltage-dependent, gamma subunit 1                                                        | 382 | 87  |
| ENSDART00000087763 | nasal embryonic LHRF factor                                                                                           | 382 | 94  |
| ENSDART00000034638 | zgc:63962                                                                                                             | 382 | 105 |
| ENSDART00000018934 | novel protein similar to vertebrate phosphodiesterase 4D, cAMP-specific (phosphodiesterase E3 dunce homolog, Dros     | 382 | 118 |
| ENSDART00000004483 | zgc:162969                                                                                                            | 381 | 99  |
| ENSDART00000075796 | septin 4b                                                                                                             | 381 | 123 |
| ENSDART00000049384 | regucalcin; similar to regucalcin                                                                                     | 381 | 40  |
| ENSDART00000074083 | similar to Rab1-prov protein                                                                                          | 381 | 92  |
| ENSDART00000085216 | si:ch211-51h13.1                                                                                                      | 381 | 65  |
| ENSDART00000098489 | si:ch211-14c7.2; hypothetical protein LOC100148665                                                                    | 380 | 103 |
| ENSDART00000011416 | ENSDARG00000013892                                                                                                    | 380 | 119 |
| ENSDART00000062930 | zgc:110459                                                                                                            | 379 | 103 |
| ENSDART00000023562 | similar to Synaptotagmin-2 (Synaptotagmin II) (SytII)                                                                 | 379 | 89  |
| ENSDART00000099226 | hypothetical LOC793487; hypothetical LOC561205; hypothetical LOC793741; si:ch211-80j13.1; hypothetical LOC100         | 379 | 125 |
| ENSDART00000089765 | similar to Rho GTPase-activating protein 17 (Rho-type GTPase-activating protein 17) (Neuron-associated development    | 379 | 102 |
| ENSDART00000103325 | similar to Serine/threonine-protein kinase Pim-3; hypothetical protein LOC100149825                                   | 378 | 88  |
| ENSDART00000105124 | ENSDARG00000074115                                                                                                    | 377 | 77  |
| ENSDART00000055619 | zgc:123224                                                                                                            | 377 | 112 |

Periderm-enriched profile

|                    |                                                                                                                        |     |     |
|--------------------|------------------------------------------------------------------------------------------------------------------------|-----|-----|
| ENSDART00000088460 | novel GTPase activating protein                                                                                        | 376 | 99  |
| ENSDART00000085325 | ENSDARG00000060507                                                                                                     | 376 | 82  |
| ENSDART00000063944 | zgc:77655                                                                                                              | 376 | 73  |
| ENSDART00000075808 | ENSDARG00000053771                                                                                                     | 375 | 76  |
| ENSDART00000060962 | novel protein similar to vertebrate pim oncogene family; si:ch211-215m21.14; si:ch211-215m21.13; si:ch211-220i15       | 375 | 100 |
| ENSDART00000091828 | similar to spectrin repeat containing, nuclear envelope 1                                                              | 373 | 97  |
| ENSDART00000047936 | similar to WAS protein family, member 3                                                                                | 373 | 55  |
| ENSDART00000108911 | similar to modular domain immune-type receptor 3                                                                       | 373 | 95  |
| ENSDART00000016983 | spondin 1a                                                                                                             | 373 | 90  |
| ENSDART00000058324 | zgc:113320                                                                                                             | 373 | 109 |
| ENSDART00000060483 | ST3 beta-galactoside alpha-2,3-sialyltransferase 2                                                                     | 373 | 87  |
| ENSDART00000054452 | similar to Disks large-associated protein 1 (DAP-1) (Guanylate kinase-associated protein) (hGKAP) (SAP90/PSD-95-as     | 372 | 113 |
| ENSDART00000097757 | upf1 regulator of nonsense transcripts homolog (yeast)                                                                 | 372 | 83  |
| ENSDART00000106432 | zgc:173480                                                                                                             | 372 | 116 |
| ENSDART00000105048 | similar to zinc finger protein 629                                                                                     | 372 | 119 |
| ENSDART00000098687 | similar to growth factor receptor-bound protein 14                                                                     | 372 | 121 |
| ENSDART00000010378 | myosin IIIB                                                                                                            | 372 | 64  |
| ENSDART00000062138 | zgc:110298                                                                                                             | 371 | 109 |
| ENSDART00000092373 | myosin, heavy chain 9, non-muscle like-1                                                                               | 371 | 101 |
| ENSDART00000092983 | similar to MYC-associated zinc finger protein                                                                          | 371 | 101 |
| ENSDART00000082377 | ENSDARG00000063362                                                                                                     | 371 | 77  |
| ENSDART00000015117 | zgc:91918                                                                                                              | 371 | 113 |
| ENSDART00000100479 | solute carrier family 7 (cationic amino acid transporter, y+ system), member 9                                         | 371 | 115 |
| ENSDART00000090790 | cell adhesion molecule 2b                                                                                              | 370 | 110 |
| ENSDART00000115052 | ENSDARG00000074685                                                                                                     | 370 | 62  |
| ENSDART00000042875 | similar to calcium transporter 2                                                                                       | 370 | 75  |
| ENSDART00000005667 | glutamic pyruvate transaminase (alanine aminotransferase) 2, like                                                      | 370 | 70  |
| ENSDART00000006580 | similar to Transcription factor EB                                                                                     | 369 | 64  |
| ENSDART00000010452 | zgc:91860                                                                                                              | 369 | 44  |
| ENSDART00000038748 | similar to Dual specificity tyrosine-phosphorylation-regulated kinase 1A (Protein kinase minibrain homolog) (MNBH) (F  | 369 | 109 |
| ENSDART00000052097 | zgc:92739                                                                                                              | 368 | 86  |
| ENSDART00000111989 | ENSDARG00000075922                                                                                                     | 368 | 81  |
| ENSDART00000009356 | protein phosphatase 2, regulatory subunit B', epsilon isoform a; protein phosphatase 2, regulatory subunit B', epsilon | 367 | 99  |
| ENSDART00000088890 | similar to Probable phospholipid-transporting ATPase ID (ATPase class I type 8B member 2)                              | 367 | 75  |
| ENSDART00000055295 | zgc:112484; hypothetical LOC791527                                                                                     | 367 | 48  |
| ENSDART00000063624 | neuropeptide Y receptor Y4                                                                                             | 367 | 58  |
| ENSDART00000078447 | tumor protein p63 regulated 1                                                                                          | 366 | 74  |
| ENSDART00000092094 | similar to Uncharacterized protein C10orf30                                                                            | 365 | 105 |
| ENSDART00000085319 | novel protein similar to H.sapiens son of sevenless homolog                                                            | 365 | 76  |
| ENSDART00000059046 | similar to PR domain containing 10; PR domain containing 10                                                            | 365 | 120 |
| ENSDART00000075241 | si:ch73-314g15.3                                                                                                       | 365 | 98  |
| ENSDART00000067708 | solute carrier family 27 (fatty acid transporter), member 6                                                            | 364 | 107 |
| ENSDART00000034441 | zgc:73347                                                                                                              | 364 | 85  |
| ENSDART00000079393 | similar to Serine/threonine-protein kinase Pim-3                                                                       | 364 | 61  |
| ENSDART00000103833 | zgc:175226                                                                                                             | 364 | 63  |
| ENSDART00000063857 | si:ch211-184m19.2                                                                                                      | 364 | 89  |
| ENSDART00000062995 | insulin-like growth factor 3                                                                                           | 363 | 105 |
| ENSDART00000033528 | similar to Tumor necrosis factor, alpha-induced protein 3 (Putative DNA-binding protein A20) (Zinc finger protein A20) | 362 | 28  |
| ENSDART00000102696 | ENSDARG00000070145                                                                                                     | 362 | 108 |
| ENSDART00000101809 | crystallin, gamma M2d2; crvstallin, gamma M2d1; zgc:171792; crystallin, gamma M2d8; crystallin, gamma M2d4; hv         | 361 | 118 |
| ENSDART00000065423 | si:ch211-126j24.1                                                                                                      | 361 | 117 |
| ENSDART00000092131 | similar to Sodium- and chloride-dependent creatine transporter 1 (CT1) (Creatine transporter 1) (Solute carrier family | 361 | 108 |
| ENSDART00000060764 | sprouty-related, EVH1 domain containing 1                                                                              | 361 | 65  |
| ENSDART00000044425 | ENSDARG00000010940                                                                                                     | 360 | 47  |
| ENSDART00000104593 | similar to tripartite motif protein 35                                                                                 | 360 | 45  |
| ENSDART00000054105 | KIAA0947-like (H. sapiens)                                                                                             | 360 | 107 |
| ENSDART00000089173 | similar to Probable phospholipid-transporting ATPase ID (ATPase class I type 8B member 2)                              | 360 | 95  |
| ENSDART00000055833 | similar to Wnt6                                                                                                        | 360 | 83  |
| ENSDART00000080770 | TATA element modulatory factor 1                                                                                       | 360 | 118 |
| ENSDART00000005112 | si:dkeyp-34c12.1                                                                                                       | 360 | 113 |
| ENSDART00000074157 | ENSDARG00000052327                                                                                                     | 360 | 80  |
| ENSDART00000113553 | ENSDARG00000077787                                                                                                     | 359 | 54  |
| ENSDART00000112576 | ENSDARG00000076071                                                                                                     | 359 | 69  |
| ENSDART00000092988 | novel protein similar to vertebrate potassium channel, subfamily K, member 9 (KCNK9)                                   | 359 | 85  |
| ENSDART00000109420 | Kv channel interacting protein 1 b                                                                                     | 359 | 93  |
| ENSDART00000082046 | neurotrophin 3                                                                                                         | 359 | 91  |
| ENSDART00000020638 | zgc:100963                                                                                                             | 359 | 105 |
| ENSDART00000055336 | DENN/MADD domain containing 1A                                                                                         | 358 | 38  |
| ENSDART00000057567 | si:ch211-240i19.5                                                                                                      | 358 | 76  |
| ENSDART00000008336 | ENSDARG00000021820                                                                                                     | 358 | 55  |
| ENSDART00000088011 | transmembrane protein 2                                                                                                | 358 | 99  |
| ENSDART00000039878 | SAP30 binding protein                                                                                                  | 357 | 88  |
| ENSDART00000013605 | zgc:158317; hypothetical protein LOC100151514                                                                          | 357 | 74  |
| ENSDART00000024806 | sp9 transcription factor                                                                                               | 357 | 57  |
| ENSDART00000025781 | ENSDARG00000016310                                                                                                     | 356 | 107 |
| ENSDART00000034184 | si:dkeyp-93d12.1; similar to Tudor domain-containing protein 6 (Antigen NY-CO-45) (Cancer/testis antigen 41.2) (CT     | 356 | 92  |
| ENSDART00000083537 | family with sequence similarity 134, member C                                                                          | 356 | 63  |
| ENSDART00000079832 | tryptophan hydroxylase 2 (tryptophan 5-monoxygenase)                                                                   | 356 | 117 |
| ENSDART00000053641 | zgc:123347                                                                                                             | 356 | 75  |
| ENSDART00000093427 | pde11a                                                                                                                 | 356 | 108 |
| ENSDART00000102295 | alcohol dehydrogenase 8a; alcohol dehydrogenase 8b                                                                     | 355 | 118 |
| ENSDART00000017735 | si:ch211-200p13.4                                                                                                      | 355 | 115 |
| ENSDART00000099604 | zgc:172059                                                                                                             | 355 | 84  |
| ENSDART00000034745 | zgc:172124                                                                                                             | 354 | 108 |
| ENSDART00000104107 | zgc:173544; hypothetical LOC794329                                                                                     | 354 | 54  |
| ENSDART00000084850 | si:ch211-152c12.2                                                                                                      | 354 | 63  |
| ENSDART00000081328 | zgc:101876                                                                                                             | 354 | 68  |
| ENSDART00000091468 | furin (paired basic amino acid cleaving enzyme) a                                                                      | 354 | 90  |
| ENSDART00000058388 | similar to Discoidin, CUB and LCCL domain-containing protein 1                                                         | 353 | 99  |
| ENSDART00000042767 | ENSDARG00000004445                                                                                                     | 353 | 38  |
| ENSDART00000053527 | solute carrier family 34 (sodium phosphate), member 2b                                                                 | 353 | 68  |
| ENSDART00000061989 | zgc:101575                                                                                                             | 352 | 77  |
| ENSDART00000056254 | semaphorin 4e; signal transducing adaptor family member 2a                                                             | 352 | 105 |
| ENSDART00000099074 | similar to cytochrome P450                                                                                             | 352 | 47  |
| ENSDART00000078271 | zgc:85981                                                                                                              | 352 | 67  |
| ENSDART00000031412 | si:dkeyp-14a7.4                                                                                                        | 351 | 84  |
| ENSDART00000110152 | colony stimulating factor 1a (macrophage)                                                                              | 351 | 86  |

Periderm-enriched profile

|                     |                                                                                                                       |     |     |
|---------------------|-----------------------------------------------------------------------------------------------------------------------|-----|-----|
| ENSDART00000085676  | similar to calsyntenin 2                                                                                              | 350 | 102 |
| ENSDART00000083473  | similar to transient receptor potential cation channel, subfamily M, member 5                                         | 349 | 91  |
| ENSDART00000038924  | sulfotransferase family 1, cytosolic sulfotransferase 1                                                               | 349 | 109 |
| ENSDART00000027026  | alpha-1-microglobulin/bikunin precursor, like                                                                         | 349 | 69  |
| ENSDART00000081269  | zgc:66052                                                                                                             | 349 | 59  |
| ENSDART00000053463  | monoglyceride lipase                                                                                                  | 349 | 94  |
| ENSDART00000059193  | protogenin homolog b (Gallus gallus)                                                                                  | 349 | 65  |
| ENSDART00000044126  | ENSDARG00000020655                                                                                                    | 348 | 112 |
| ENSDART00000007624  | ENSDARG00000059960                                                                                                    | 348 | 72  |
| ENSDART00000101637  | zgc:154038; hypothetical LOC791938                                                                                    | 348 | 84  |
| ENSDART00000089015  | similar to Zinc finger and BTB domain containing protein 7 (Leukemia/lymphoma related factor) (Factor that binds to i | 347 | 104 |
| ENSDART00000019392  | zgc:76925                                                                                                             | 347 | 77  |
| ENSDART00000110541  | similar to transmembrane protein 90A                                                                                  | 346 | 27  |
| ENSDART00000098580  | zgc:136906                                                                                                            | 346 | 93  |
| ENSDART00000023971  | solute carrier family 5 (sodium iodide symporter), member 5                                                           | 346 | 70  |
| ENSDART00000022270  | ENSDARG00000011333                                                                                                    | 346 | 111 |
| ENSDART00000082250  | zgc:136930                                                                                                            | 345 | 107 |
| ENSDART00000106318  | ENSDARG00000071745                                                                                                    | 345 | 34  |
| ENSDART00000083591  | similar to potassium inwardly-rectifying channel subfamily J member 12                                                | 345 | 72  |
| ENSDART00000015801  | novel protein similar to mouse and human discoidin, CUB and LCCL domain containing                                    | 345 | 87  |
| ENSDART00000058643  | zinc finger protein 750                                                                                               | 344 | 47  |
| ENSDART00000039616  | low density lipoprotein receptor-related protein 11                                                                   | 344 | 68  |
| ENSDART00000112154  | ENSDARG00000078809                                                                                                    | 343 | 92  |
| ENSDART00000065119  | similar to N-acetylglucosamine-6-O-sulfotransferase                                                                   | 343 | 102 |
| ENSDART00000060944  | mitochondrial ribosomal protein L39                                                                                   | 343 | 106 |
| ENSDART00000036374  | ENSDARG00000077873                                                                                                    | 343 | 100 |
| ENSDART00000102651  | nucleolar and coiled-body phosphoprotein 1-like; similar to Nucleolar phosphoprotein p130 (Nucleolar 130 kDa protein  | 342 | 60  |
| ENSDART00000076845  | Fraser syndrome 1                                                                                                     | 341 | 102 |
| ENSDART00000079534  | similar to 5-hydroxytryptamine receptor 7                                                                             | 341 | 63  |
| ENSDART00000016586  | regulator of G-protein signaling 5                                                                                    | 341 | 46  |
| ENSDART00000099599  | zgc:162977                                                                                                            | 341 | 57  |
| ENSDART00000082296  | prostaglandin E receptor 4 (subtype EP4) a                                                                            | 341 | 97  |
| ENSDART00000089274  | mitogen-activated protein kinase kinase kinase 7 interacting protein 3 like                                           | 340 | 41  |
| ENSDART00000099366  | ENSDARG00000076998                                                                                                    | 339 | 79  |
| ENSDART00000075982  | ankyrin repeat domain 55                                                                                              | 339 | 100 |
| ENSDART00000051972  | granulin 1                                                                                                            | 339 | 86  |
| ENSDART00000064752  | ENSDARG00000017391                                                                                                    | 339 | 66  |
| ENSDART00000099055  | similar to cold shock domain containing C2, RNA binding                                                               | 339 | 80  |
| ENSDART00000074217  | anoctamin 1, calcium activated chloride channel                                                                       | 339 | 48  |
| ENSDART00000090370  | zgc:152911                                                                                                            | 338 | 46  |
| ENSDART00000076693  | STAM binding protein                                                                                                  | 338 | 104 |
| ENSDART00000063047  | similar to PTK6 protein tyrosine kinase 6                                                                             | 338 | 68  |
| ENSDART00000077447  | zgc:110410                                                                                                            | 338 | 69  |
| ENSDART00000079321  | autoimmune regulator                                                                                                  | 338 | 44  |
| ENSDART00000078672  | gonadotropin-releasing hormone 3                                                                                      | 338 | 64  |
| ENSDART00000075905  | zgc:55701                                                                                                             | 337 | 64  |
| ENSDART00000005105  | proteasome activator subunit 1                                                                                        | 337 | 63  |
| ENSDART00000056884  | similar to C-C chemokine receptor type 6 (C-C CKR-6) (CC-CKR-6) (CCR-6) (LARC receptor) (GPR-CY4) (GPCRY4) (Ch        | 337 | 55  |
| ENSDART00000092011  | ENSDARG00000063140                                                                                                    | 337 | 52  |
| ENSDART00000044504  | zgc:109965                                                                                                            | 337 | 77  |
| ENSDART00000026280  | pleckstrin 2                                                                                                          | 337 | 34  |
| ENSDART00000027174  | ENSDARG00000006169                                                                                                    | 336 | 86  |
| ENSDART00000104866  | similar to L-lactate dehydrogenase B chain (LDH-B) (LDH heart subunit) (LDH-H) (Renal carcinoma antigen NY-REN-4f     | 336 | 76  |
| ENSDART00000086976  | similar to adenomatosis polyposis coli down-regulated 1                                                               | 336 | 85  |
| ENSDART00000026903  | protein tyrosine phosphatase, receptor type, A                                                                        | 336 | 105 |
| ENSDART00000076269  | ENSDARG00000054136                                                                                                    | 336 | 82  |
| ENSDART00000047929  | si:ch211-214j24.8                                                                                                     | 335 | 100 |
| ENSDART00000110353  | similar to SAM and SH3 domain-containing protein 1 (Proline-glutamate repeat-containing protein)                      | 335 | 84  |
| ENSDART00000067530  | zgc:136569                                                                                                            | 335 | 54  |
| ENSDART00000105917  | zgc:158663                                                                                                            | 334 | 95  |
| ENSDART000000005218 | cat eye syndrome chromosome region, candidate 1b                                                                      | 334 | 70  |
| ENSDART00000050403  | Rho GTPase activating protein 12a                                                                                     | 334 | 63  |
| ENSDART00000105614  | si:ch211-195i21.1                                                                                                     | 334 | 93  |
| ENSDART00000024076  | hypothetical LOC791683; secretory carrier membrane protein 2, like                                                    | 333 | 58  |
| ENSDART00000063938  | similar to syntrophin-associated serine/threonine kinase SAST170                                                      | 333 | 101 |
| ENSDART00000110352  | zgc:112172                                                                                                            | 333 | 57  |
| ENSDART00000112949  | solute carrier family 31 (copper transporters), member 1                                                              | 333 | 100 |
| ENSDART00000057735  | complement component 8, alpha polypeptide                                                                             | 332 | 54  |
| ENSDART00000090397  | hypothetical LOC566592                                                                                                | 332 | 92  |
| ENSDART00000009500  | allograft inflammatory factor 1-like                                                                                  | 331 | 49  |
| ENSDART00000033404  | similar to opsin 5                                                                                                    | 331 | 73  |
| ENSDART00000080768  | dipeptidyl-peptidase 6                                                                                                | 331 | 96  |
| ENSDART00000057224  | ENSDARG00000039164                                                                                                    | 331 | 36  |
| ENSDART00000099863  | solute carrier family 25, member 37                                                                                   | 331 | 65  |
| ENSDART00000089965  | transmembrane protein 167A                                                                                            | 331 | 55  |
| ENSDART00000085736  | similar to perforin                                                                                                   | 331 | 85  |
| ENSDART00000079003  | zgc:136389; similar to Serum amyloid P-component precursor (SAP); hypothetical LOC792236; zgc:152809; si:ch211        | 330 | 97  |
| ENSDART00000109980  | zgc:165522                                                                                                            | 330 | 71  |
| ENSDART00000111691  | muscleblind-like 3 (Drosophila)                                                                                       | 330 | 83  |
| ENSDART00000099209  | ENSDARG00000068571                                                                                                    | 329 | 74  |
| ENSDART000000033970 | hypothetical protein LOC407625                                                                                        | 329 | 70  |
| ENSDART00000099785  | myosin binding protein C, cardiac; hypothetical protein LOC100149567                                                  | 329 | 107 |
| ENSDART00000065881  | similar to UPF0318 protein FAM120C                                                                                    | 329 | 55  |
| ENSDART00000099302  | similar to tripartite motif protein 25; finTRIM family, member 72                                                     | 329 | 94  |
| ENSDART00000087867  | zgc:158624                                                                                                            | 328 | 75  |
| ENSDART00000104639  | similar to glucagon receptor                                                                                          | 328 | 61  |
| ENSDART00000052115  | ENSDARG00000077763                                                                                                    | 328 | 69  |
| ENSDART00000106513  | adenosine deaminase, RNA-specific, B2 (RED2 homolog rat)                                                              | 328 | 86  |
| ENSDART00000076575  | ras homolog gene family, member F                                                                                     | 327 | 49  |
| ENSDART00000076317  | zgc:171544                                                                                                            | 327 | 72  |
| ENSDART00000009586  | ENSDARG00000054200                                                                                                    | 327 | 92  |
| ENSDART00000090727  | ENSDARG00000062632                                                                                                    | 327 | 106 |
| ENSDART00000075990  | hypothetical protein LOC792482                                                                                        | 327 | 53  |
| ENSDART00000023809  | si:ch211-13n20.2                                                                                                      | 327 | 45  |
| ENSDART00000032123  | similar to zinc finger protein 537                                                                                    | 327 | 51  |
| ENSDART00000083447  | ENSDARG00000075451                                                                                                    | 327 | 108 |
| ENSDART00000009892  | gamma-aminobutyric acid (GABA) B receptor, 1                                                                          | 326 | 61  |

Periderm-enriched profile

|                     |                                                                                                                  |     |     |
|---------------------|------------------------------------------------------------------------------------------------------------------|-----|-----|
| ENSDART0000006423   | si:dkey-164k19.1                                                                                                 | 326 | 41  |
| ENSDART00000084606  | im:7156990                                                                                                       | 326 | 71  |
| ENSDART00000008893  | carbonic anhydrase XV a                                                                                          | 326 | 50  |
| ENSDART00000083976  | SH2B adaptor protein 1                                                                                           | 325 | 107 |
| ENSDART00000099320  | zgc:103654                                                                                                       | 325 | 75  |
| ENSDART00000010732  | ENSDARG00000010296                                                                                               | 325 | 96  |
| ENSDART00000084474  | zgc:162264                                                                                                       | 324 | 91  |
| ENSDART00000085351  | similar to transient receptor potential cation channel, subfamily M, member 2                                    | 324 | 83  |
| ENSDART00000087426  | B-cell CLL/lymphoma 11A                                                                                          | 324 | 101 |
| ENSDART00000036266  | hypothetical protein LOC100150467; zgc:113250                                                                    | 324 | 21  |
| ENSDART00000050945  | novel protein similar to H.sapiens LAYN, layilin (LAYN)                                                          | 323 | 68  |
| ENSDART000000113203 | novel protein similar to vertebrate pim oncogene family; si:ch211-215m21.14; si:ch211-215m21.13; si:ch211-220i15 | 323 | 53  |
| ENSDART000000100929 | si:dkey-6e12.4                                                                                                   | 323 | 92  |
| ENSDART000000100557 | ENSDARG00000016337                                                                                               | 322 | 53  |
| ENSDART00000024312  | 2-deoxyribose-5-phosphate aldolase homolog (C. elegans)                                                          | 322 | 87  |
| ENSDART00000030030  | ENSDARG00000027875                                                                                               | 322 | 89  |
| ENSDART00000074424  | novel immune-type receptor 13                                                                                    | 322 | 72  |
| ENSDART000000113487 | si:dkey-245p14.4                                                                                                 | 321 | 62  |
| ENSDART000000104703 | inositol(myo)-1(or 4)-monophosphatase 1; im:7144442                                                              | 321 | 80  |
| ENSDART00000036926  | vang-like 1 (van gogh, Drosophila)                                                                               | 321 | 73  |
| ENSDART00000033819  | protein kinase C, delta                                                                                          | 320 | 47  |
| ENSDART000000104488 | similar to trypsinogen 7                                                                                         | 320 | 80  |
| ENSDART000000100241 | zgc:103585                                                                                                       | 320 | 31  |
| ENSDART000000019104 | fructose-1,6-bisphosphatase 2                                                                                    | 320 | 63  |
| ENSDART000000065889 | wingless-type MMTV integration site family, member 7A                                                            | 320 | 86  |
| ENSDART00000048210  | similar to creatine kinase, mitochondrial 2 (sarcomeric); creatine kinase, mitochondrial 2 (sarcomeric)          | 320 | 105 |
| ENSDART00000066296  | similar to pentraxin                                                                                             | 320 | 40  |
| ENSDART00000017774  | similar to voltage-dependent calcium channel gamma-5 subunit                                                     | 319 | 36  |
| ENSDART000000100098 | ENSDARG00000069026                                                                                               | 319 | 73  |
| ENSDART00000062603  | cell adhesion molecule 1b                                                                                        | 318 | 55  |
| ENSDART000000100109 | novel protein similar to vertebrate pim oncogene family; similar to Serine/threonine-protein kinase Pim-3        | 318 | 85  |
| ENSDART000000102915 | ENSDARG00000010632                                                                                               | 317 | 64  |
| ENSDART000000092977 | hypothetical protein LOC100002227                                                                                | 317 | 83  |
| ENSDART000000057986 | tissue specific transplantation antigen P35B; zgc:100864                                                         | 317 | 30  |
| ENSDART000000886201 | ENSDARG00000029482                                                                                               | 317 | 105 |
| ENSDART00000074888  | ENSDARG00000074072                                                                                               | 316 | 68  |
| ENSDART00000048720  | crystallin, beta A1a                                                                                             | 316 | 57  |
| ENSDART00000056278  | similar to mitochondrial glutamate carrier 1                                                                     | 316 | 101 |
| ENSDART000000108533 | si:ch1073-126c3.2                                                                                                | 316 | 76  |
| ENSDART000000023058 | EF-hand domain (C-terminal) containing 1                                                                         | 316 | 59  |
| ENSDART00000049061  | cyclin-dependent kinase inhibitor 1b, like                                                                       | 315 | 98  |
| ENSDART000000100075 | similar to transmembrane protein 184b                                                                            | 315 | 62  |
| ENSDART000000077376 | similar to ferric-chelate reductase 1                                                                            | 315 | 104 |
| ENSDART00000065583  | ENSDARG00000018782                                                                                               | 315 | 74  |
| ENSDART000000100311 | IKAROS family zinc finger 2                                                                                      | 315 | 48  |
| ENSDART00000054959  | similar to ubiquitin specific protease 34                                                                        | 315 | 98  |
| ENSDART00000040410  | tyrosine hydroxylase                                                                                             | 315 | 61  |
| ENSDART00000079212  | polyhomeotic-like 2 (Drosophila)                                                                                 | 314 | 66  |
| ENSDART000000037740 | similar to rCG61419                                                                                              | 314 | 84  |
| ENSDART000000097345 | ENSDARG00000056394                                                                                               | 314 | 104 |
| ENSDART00000079504  | ankyrin repeat and kinase domain containing 1                                                                    | 313 | 31  |
| ENSDART000000092015 | zgc:154031                                                                                                       | 313 | 76  |
| ENSDART000000098151 | ENSDARG00000002295                                                                                               | 313 | 71  |
| ENSDART00000086094  | heart adaptor protein 1                                                                                          | 313 | 93  |
| ENSDART00000087454  | grainyhead-like 1 (Drosophila)                                                                                   | 313 | 77  |
| ENSDART00000051616  | novel protein similar to vertebrate aldehyde dehydrogenase 3 family                                              | 313 | 50  |
| ENSDART000000104234 | connexin 35                                                                                                      | 313 | 76  |
| ENSDART000000115261 | ENSDARG00000073759                                                                                               | 313 | 99  |
| ENSDART00000082127  | similar to HEAT repeat containing 5B                                                                             | 313 | 82  |
| ENSDART000000105504 | si:dkey-78i4.10; si:dkey-78i4.12                                                                                 | 312 | 62  |
| ENSDART00000006482  | transient receptor potential cation channel, subfamily C, member 4 associated protein b                          | 312 | 90  |
| ENSDART00000084525  | im:6912105                                                                                                       | 312 | 72  |
| ENSDART00000019667  | ring finger protein 114                                                                                          | 312 | 61  |
| ENSDART000000103297 | si:ch211-236j4.1                                                                                                 | 312 | 66  |
| ENSDART000000102419 | insulin-like growth factor 2 mRNA binding protein 2a                                                             | 312 | 87  |
| ENSDART00000019017  | similar to BTB and CNC homology 1, basic leucine zipper transcription factor 2                                   | 312 | 56  |
| ENSDART00000006942  | ENSDARG00000043249                                                                                               | 311 | 77  |
| ENSDART00000000838  | solute carrier family 6 (neurotransmitter transporter, GABA), member 13 like                                     | 311 | 75  |
| ENSDART000000093146 | block of proliferation 1; si:ch211-251g8.2                                                                       | 311 | 77  |
| ENSDART000000111672 | ENSDARG00000055607                                                                                               | 310 | 51  |
| ENSDART00000099934  | similar to voltage-gated potassium channel type 3                                                                | 310 | 85  |
| ENSDART00000021510  | splA/ryanodine receptor domain and SOCS box containing 4a                                                        | 310 | 60  |
| ENSDART00000084675  | novel protein similar to vertebrate WD repeat domain 44 (WDR44); si:ch211-1c14.1                                 | 310 | 93  |
| ENSDART00000077125  | amyloid beta (A4) precursor-like protein 2                                                                       | 310 | 80  |
| ENSDART00000078300  | zgc:110243                                                                                                       | 310 | 32  |
| ENSDART00000064475  | claudin 7                                                                                                        | 309 | 60  |
| ENSDART00000002856  | dopamine receptor D2 like                                                                                        | 309 | 78  |
| ENSDART00000097524  | similar to WD repeat and FYVE domain-containing protein 3 (Autophagy-linked FYVE protein) (Alfy)                 | 309 | 62  |
| ENSDART00000007122  | guanylate cyclase activator 1B                                                                                   | 309 | 73  |
| ENSDART000000104135 | similar to Gamma-aminobutyric acid receptor subunit alpha-5 precursor (GABA(A) receptor subunit alpha-5)         | 308 | 96  |
| ENSDART00000060455  | si:dkey-241i7.1                                                                                                  | 308 | 70  |
| ENSDART00000097685  | similar to CG7509 CG7509-PA                                                                                      | 308 | 67  |
| ENSDART00000079106  | novel protein similar to vertebrate pim family oncogene                                                          | 308 | 71  |
| ENSDART00000090000  | similar to Uncharacterized protein KIAA1109 (Fragile site-associated protein homolog)                            | 308 | 98  |
| ENSDART000000091713 | ENSDARG00000063022                                                                                               | 308 | 97  |
| ENSDART00000051719  | matrilin 1                                                                                                       | 307 | 60  |
| ENSDART000000114583 | ENSDARG00000078697                                                                                               | 307 | 33  |
| ENSDART000000027250 | hypothetical protein LOC100005704                                                                                | 306 | 62  |
| ENSDART00000033072  | enhancer of polycomb homolog 1 (Drosophila)                                                                      | 306 | 83  |
| ENSDART000000015302 | translocase of outer mitochondrial membrane 40 homolog (yeast)                                                   | 306 | 55  |
| ENSDART00000057846  | hypothetical protein LOC100150861; similar to very large inducible GTPase 1                                      | 306 | 32  |
| ENSDART00000077231  | melanocortin 2 receptor                                                                                          | 305 | 36  |
| ENSDART00000029668  | ENSDARG00000007398                                                                                               | 305 | 96  |
| ENSDART00000082467  | hypothetical protein LOC100150263; polymerase I and transcript release factor                                    | 305 | 85  |
| ENSDART00000010885  | ENSDARG00000060357                                                                                               | 305 | 67  |
| ENSDART00000091894  | similar to mannosidase, alpha, class 2A, member 2                                                                | 305 | 39  |
| ENSDART00000036979  | EFR3 homolog A (S. cerevisiae)                                                                                   | 304 | 38  |

Periderm-enriched profile

|                    |                                                                                |     |    |
|--------------------|--------------------------------------------------------------------------------|-----|----|
| ENSDART0000054687  | interleukin 1 receptor accessory protein-like 2                                | 304 | 94 |
| ENSDART0000084466  | similar to GDH/6PGL endoplasmic bifunctional protein precursor                 | 304 | 85 |
| ENSDART00000100265 | similar to Transmembrane protein 194                                           | 303 | 61 |
| ENSDART0000066855  | zgc:173439                                                                     | 303 | 85 |
| ENSDART0000017467  | aggrecan 1                                                                     | 303 | 77 |
| ENSDART0000053921  | solute carrier family 7 (cationic amino acid transporter, γ+ system), member 2 | 302 | 71 |
| ENSDART0000098729  | zgc:171509                                                                     | 302 | 69 |
| ENSDART0000053754  | hyaluronan synthase 2; similar to hyaluronan synthase 2                        | 302 | 57 |
| ENSDART00000105399 | si:dkey-28h18.4                                                                | 302 | 49 |
| ENSDART00000113171 | neuroigin 1                                                                    | 302 | 85 |
| ENSDART0000035696  | zgc:162320                                                                     | 301 | 36 |
| ENSDART0000097618  | hypothetical protein LOC798260                                                 | 301 | 83 |
| ENSDART0000089694  | ENSDARG0000025920                                                              | 301 | 98 |
| ENSDART0000085668  | similar to 5-AMP-activated protein kinase alpha-2 catalytic subunit            | 301 | 97 |
| ENSDART0000010584  | si:dkey-85n7.2                                                                 | 301 | 66 |
| ENSDART0000087643  | zgc:158349                                                                     | 301 | 66 |
| ENSDART0000088842  | discs, large (Drosophila) homolog-associated protein 1                         | 300 | 72 |
| ENSDART0000090446  | si:ch211-218c6.1                                                               | 300 | 75 |

**Supplemental Table S2: dnIrf6-inhibited profile****\*\*\*Expression value in control-injected embryos >299 and expression value in dnIrf6-injected embryos < expression value in control-injected embryos, adj. p<0.05**

ENSDART00000114970 zgc:171223  
 ENSDART00000067854 tumor necrosis factor, alpha-induced protein 8, like  
 ENSDART00000003929 midnolin  
 ENSDART00000099224 deltaD  
 ENSDART00000060150 gastrulation specific protein  
 ENSDART00000050906 leucine-rich repeats and WD repeat domain containing 1  
 ENSDART00000100817 ENSDARG00000069339  
 ENSDART00000065853 dehydrogenase/reductase (SDR family) member 3b  
 ENSDART00000022668 si:ch211-152c2.2  
 ENSDART00000021159 LIM homeobox 1b  
 ENSDART00000055241 periplakin  
 ENSDART00000008795 zgc:73377  
 ENSDART00000019196 lefty1  
 ENSDART00000112326 sc:d0144  
 ENSDART00000013972 similar to absent in melanoma 1-like  
 ENSDART00000080294 si:dkey-195c14.1  
 ENSDART00000023985 zgc:153952  
 ENSDART00000008115 hydroxy-delta-5-steroid dehydrogenase, 3 beta- and steroid delta-isomerase 1  
 ENSDART00000113050 kin of IRRE like 3 (Drosophila)  
 ENSDART00000082085 gooseoid  
 ENSDART00000011627 iroquois homeobox protein 7  
 ENSDART00000079149 X-linked Kx blood group (McLeod syndrome)  
 ENSDART00000013798 nuclear factor of kappa light polypeptide gene enhancer in B-cells inhibitor, alpha a  
 ENSDART00000025153 hypothetical protein LOC100151105; GATA-binding protein 3  
 ENSDART00000050914 zgc:136538; similar to draculin; similar to zinc finger protein 227; draculin  
 ENSDART00000039295 ENSDARG00000018186  
 ENSDART00000079884 novel protein similar to vertebrate arachidonate 5-lipoxygenase (ALOX5)  
 ENSDART00000052521 nuclear factor of activated T-cells, cytoplasmic, calcineurin-dependent 1  
 ENSDART00000042683 similar to Ca2+-dependent secretion activator  
 ENSDART00000028673 lunatic fringe homolog  
 ENSDART00000063777 potassium inwardly-rectifying channel, subfamily J, member 13  
 ENSDART00000103355 ras homolog gene family, member V  
 ENSDART00000097684 neuro-oncological ventral antigen 2; neuro-oncological ventral antigen 1  
 ENSDART00000079114 similar to iroquois homeobox protein 1, b; iroquois homeobox protein 1, b; similar to Iroquois homeobox protein 1, b  
 ENSDART00000027666 nuclear receptor subfamily 2, group F, member 6b  
 ENSDART00000109423 hydroxysteroid (17-beta) dehydrogenase 12a  
 ENSDART00000080166 similar to RING finger protein 157  
 ENSDART00000088914 angiominin like 2  
 ENSDART00000057986 tissue specific transplantation antigen P35B; zgc:100864  
 ENSDART00000066946 transmembrane and coiled-coil domain family 3  
 ENSDART00000104448 si:ch211-262h13.3  
 ENSDART00000084868 sodium channel, voltage-gated, type IV, beta b  
 ENSDART00000103925 zgc:65781  
 ENSDART00000066835 frizzled homolog 8a  
 ENSDART00000105588 similar to protocadherin 1  
 ENSDART00000082097 similar to protease, serine, 35  
 ENSDART00000020750 keratin 18  
 ENSDART00000105168 si:ch211-133n4.4  
 ENSDART00000114314 transglutaminase 2b; similar to transglutaminase 2b; hypothetical protein LOC100149033  
 ENSDART00000106561 zgc:113886; similar to zinc finger protein 53; zgc:100951; zgc:173816; hypothetical LOC798798  
 ENSDART00000054472 tolloid-like 1; similar to Dorsal-ventral patterning tolloid-like protein 1 precursor (Mini fin protein)  
 ENSDART00000056850 zgc:163077  
 ENSDART00000101459 phosphorylase, glycogen (muscle) b  
 ENSDART00000078710 sortilin 1b  
 ENSDART00000023180 ephrin B2b  
 ENSDART00000087726 insulin-like growth factor 2 mRNA binding protein 1  
 ENSDART00000079401 similar to AHNK nucleoprotein  
 ENSDART00000100060 desmocollin 2 like  
 ENSDART00000081152 centrosomal protein 76  
 ENSDART00000099074 similar to cytochrome P450  
 ENSDART00000065819 chloride intracellular channel a  
 ENSDART00000079283 zgc:110069  
 ENSDART00000111524 fibroblast growth factor 3  
 ENSDART00000052366 CCAAT/enhancer binding protein (C/EBP), alpha  
 ENSDART0000008638 RGM domain family, member A  
 ENSDART00000006386 ATPase, Na+/K+ transporting, beta 1a polypeptide  
 ENSDART00000029630 fibroblast growth factor 17  
 ENSDART00000113993 ENSDARG00000078072  
 ENSDART00000102483 regulator of G-protein signalling 4  
 ENSDART00000025581 zgc:92106  
 ENSDART00000012672 calcium activated nucleotidase 1b  
 ENSDART00000105048 similar to zinc finger protein 629  
 ENSDART00000006870 prostaglandin-endoperoxide synthase 2a  
 ENSDART00000084667 similar to plasminogen related growth factor receptor 3  
 ENSDART00000011471 zgc:101565  
 ENSDART00000103640 hairy/enhancer-of-split related with YRPW motif 1  
 ENSDART00000010028 prostaglandin-endoperoxide synthase 2b  
 ENSDART00000077111 zgc:100900  
 ENSDART00000081484 zgc:66117  
 ENSDART00000051491 secreted frizzled-related protein 1a  
 ENSDART00000077853 hypermethylated in cancer 1  
 ENSDART00000038196 zgc:101640  
 ENSDART00000051804 zgc:85717  
 ENSDART00000062702 CCAAT/enhancer binding protein (C/EBP), beta  
 ENSDART00000087918 similar to solute carrier family 7 (cationic amino acid transporter, y+ system), member 3  
 ENSDART00000098246 si:dkey-7b17.2  
 ENSDART00000012120 acyl-CoA synthetase bubblegum family member 2  
 ENSDART00000084568 zgc:163027  
 ENSDART00000097210 reverse transcriptase; hypothetical protein LOC100148790; zgc:194878  
 ENSDART0000002685 nerve growth factor receptor (TNFR superfamily, member 16)  
 ENSDART0000003932 v-erb-b2 erythroblastic leukemia viral oncogene homolog 2, neuro/glioblastoma derived oncogene homolog  
 ENSDART00000000187 cadherin EGF LAG seven-pass G-type receptor 1a; similar to SI:b26L08.1 (novel protein similar to human cadherin, EGF LAG seven-pass G-type receptor (CELSR))  
 ENSDART00000017402 zgc:92046  
 ENSDART00000081604 adiponectin receptor 2

ENSDART00000066934 inter-alpha (globulin) inhibitor H5  
 ENSDART00000105036 keratin 15; type I cytokeratin, enveloping layer, like; si:dkeyp-113d7.7; type I cytokeratin, enveloping layer  
 ENSDART00000105004 keratin 15; type I cytokeratin, enveloping layer, like; si:dkeyp-113d7.7; type I cytokeratin, enveloping layer  
 ENSDART00000105024 keratin 15; type I cytokeratin, enveloping layer, like; si:dkeyp-113d7.7; type I cytokeratin, enveloping layer  
 ENSDART00000091923 similar to solute carrier family 4, sodium bicarbonate cotransporter-like, member 10  
 ENSDART00000111842 sal-like 1a (Drosophila)  
 ENSDART00000105694 zgc:64213  
 ENSDART00000088531 ENSDARG00000061798  
 ENSDART00000089078 similar to Acetyl-CoA carboxylase 2 (ACC-beta)  
 ENSDART00000103385 solute carrier family 25 (mitochondrial carrier: glutamate), member 22  
 ENSDART00000036597 pleckstrin homology domain containing, family F (with FYVE domain) member 1  
 ENSDART00000135900 wingless-type MMTV integration site family, member 11  
 ENSDART00000039880 similar to transmembrane 9 superfamily member 2  
 ENSDART00000078885 similar to Hepatocyte nuclear factor 6 (HNF-6) (One cut domain family member 1)  
 ENSDART00000082425 GATA-binding protein 2a  
 ENSDART00000078983 coiled-coil domain containing 125; similar to Kenae  
 ENSDART00000087623 similar to UDP-Gal:betaGlcNAc beta 1,3-galactosyltransferase, polypeptide 2  
 ENSDART00000045018 pyrimidinergic receptor P2Y, G-protein coupled, 4-like; similar to pyrimidinergic receptor P2Y, G-protein coupled, 4-like  
 ENSDART00000048130 START domain containing 10  
 ENSDART00000052902 zgc:153917; similar to Centaurin-beta-1 (Cnt-b1) (ARFGAP with coiled-coil, ANK repeat and PH domain-containing protein 1) (ACAP1)  
 ENSDART00000065136 hypothetical protein LOC100149261  
 ENSDART00000088178 neurexin 1a  
 ENSDART00000114926 ENSDARG00000078666  
 ENSDART00000016758 si:dkey-252h13.6  
 ENSDART00000004120 ADAM metalloproteinase with thrombospondin type 1 motif, 18  
 ENSDART00000114563 transmembrane protein 129  
 ENSDART00000053531 solute carrier family 2 (facilitated glucose transporter), member 12  
 ENSDART00000088175 MARVEL domain containing 2b  
 ENSDART00000084321 dapper homolog 2, antagonist of beta-catenin (xenopus); hypothetical protein LOC100149774  
 ENSDART00000060861 forkhead box P2  
 ENSDART00000004964 NAD(P)H dehydrogenase, quinone 1  
 ENSDART00000056519 similar to Probable G-protein coupled receptor 160  
 ENSDART00000043902 adenosine A2a receptor a  
 ENSDART00000014296 forkhead box A2  
 ENSDART00000052512 heterogeneous nuclear ribonucleoprotein A0  
 ENSDART00000027701 type I cytokeratin; zgc:109868; si:dkeyp-113d7.4  
 ENSDART00000080744 SVOP-like  
 ENSDART00000013033 ETS-domain transcription factor pea3  
 ENSDART00000075617 SRY-box containing gene 3  
 ENSDART00000082453 cadherin, EGF LAG seven-pass G-type receptor 2  
 ENSDART00000082000 ENSDARG00000059002  
 ENSDART00000084378 crumbs homolog 2  
 ENSDART00000055754 hypothetical LOC565254  
 ENSDART00000106562 ENSDARG00000040144  
 ENSDART00000097533 WW domain containing transcription regulator 1  
 ENSDART00000079115 3'-phosphoadenosine 5'-phosphosulfate synthase 2  
 ENSDART00000080771 similar to solute carrier family 6, member 15  
 ENSDART00000079953 im:7149356  
 ENSDART00000011948 protocadherin 8  
 ENSDART00000016894 similar to endothelial differentiation, lysophosphatidic acid G-protein-coupled receptor 7  
 ENSDART00000099870 cytochrome P450, family 1, subfamily B, polypeptide 1  
 ENSDART00000045574 shisa homolog 2 (Xenopus laevis)  
 ENSDART00000042441 one-eyed pinhead  
 ENSDART00000063325 hypothetical LOC791933; claudin f  
 ENSDART00000105808 zgc:92061  
 ENSDART00000105806 zgc:92061  
 ENSDART00000013638 cadherin 6  
 ENSDART00000101694 RELT tumor necrosis factor receptor  
 ENSDART00000059042 eph receptor B4a  
 ENSDART00000100818 hypothetical LOC798921  
 ENSDART00000079068 ankyrin repeat and SOCS box-containing 11  
 ENSDART00000074362 protocadherin 18b  
 ENSDART00000054801 UDP-Gal:betaGlcNAc beta 1,4-galactosyltransferase, polypeptide 1  
 ENSDART00000067006 forkhead box B1.2  
 ENSDART0000010774 zic family member 2 (odd-paired homolog, Drosophila), a  
 ENSDART00000037894 zgc:55764  
 ENSDART00000100311 IKAROS family zinc finger 2  
 ENSDART00000063320 claudin e  
 ENSDART0000017456 ventral expressed homeobox  
 ENSDART00000102257 zgc:110251  
 ENSDART00000055766 zgc:113333  
 ENSDART00000088986 hypothetical protein LOC100149363; zgc:110324  
 ENSDART00000047418 notum 3  
 ENSDART00000036939 growth arrest and DNA-damage-inducible, beta  
 ENSDART00000075274 ENSDARG00000053272  
 ENSDART00000067131 high mobility group AT-hook 2; interleukin-1 receptor-associated kinase 3  
 ENSDART00000051526 zgc:110265  
 ENSDART00000063665 chemokine (C-X-C motif) receptor 7b  
 ENSDART00000051868 cyclin D1  
 ENSDART00000113801 zgc:193505  
 ENSDART00000006212 similar to lin-28 homolog  
 ENSDART00000112318 netrin 2  
 ENSDART00000012284 zgc:63546; cytochrome P450 CYP2AA3v1  
 ENSDART00000102888 similar to cyclin-dependent kinase 6; si:ch211-234f14.1  
 ENSDART00000059182 zgc:194733; cytochrome P450  
 ENSDART00000099214 solute carrier family 16 (monocarboxylic acid transporters), member 1  
 ENSDART00000024320 Y box binding protein 1  
 ENSDART00000020575 axin 2 (conductin, axil)  
 ENSDART00000069132 cytochrome b-245, beta polypeptide (chronic granulomatous disease)  
 ENSDART00000114092 novel rhamnose binding lectin; si:dkeyp-98a7.5; hypothetical LOC564145  
 ENSDART00000056398 hypothetical protein LOC100148421  
 ENSDART00000104319 similar to inositol 1,4,5-trisphosphate 3-kinase A; inositol 1,4,5-trisphosphate 3-kinase A  
 ENSDART00000063434 receptor-interacting serine-threonine kinase 4  
 ENSDART00000053797 zgc:55813  
 ENSDART00000045110 chordin  
 ENSDART00000067152 dual-specificity tyrosine-(Y)-phosphorylation regulated kinase 2  
 ENSDART0000002965 ETS-related factor1  
 ENSDART00000013480 elongation of very long chain fatty acids (FEN1/Elo2, SUR4/Elo3, yeast)-like 1a

ENSDART0000081327 keratin 5  
 ENSDART0000090727 ENSDARG0000062632  
 ENSDART0000062303 forkhead box D5  
 ENSDART0000110550 breast cancer anti-estrogen resistance 3  
 ENSDART0000101556 ArfGAP with SH3 domain, ankyrin repeat and PH domain 2b  
 ENSDART0000002682 neuroepithelial cell transforming gene 1  
 ENSDART0000056962 F-box protein 5  
 ENSDART0000114113 SRY-box containing gene 19a  
 ENSDART0000036801 similar to CG15438 CG15438-PA  
 ENSDART0000088213 zgc:56010  
 ENSDART0000074067 ENSDARG0000052240  
 ENSDART0000025428 eph-like receptor tyrosine kinase 6  
 ENSDART0000014149 similar to FAT tumor suppressor homolog 2; similar to FAT tumor suppressor homolog 2 (Drosophila)  
 ENSDART0000114948 sprouty homolog 2  
 ENSDART0000100772 zgc:103664  
 ENSDART0000012644 keratin 4  
 ENSDART0000052570 paired-like homeodomain transcription factor 2  
 ENSDART0000066622 similar to one cut domain, family member 2  
 ENSDART0000104713 zgc:92069  
 ENSDART0000031426 zgc:193698; similar to SKI-like  
 ENSDART0000029371 desmoplakin a  
 ENSDART0000093017 PERP, TP53 apoptosis effector  
 ENSDART0000112287 wu:fc51b03  
 ENSDART0000083495 similar to formin-like 1  
 ENSDART0000104493 SRY-box containing gene 2  
 ENSDART0000055325 proteasome (prosome, macropain) subunit, beta type, 7  
 ENSDART0000018514 deltaC  
 ENSDART0000025583 fibroblast growth factor 8 a  
 ENSDART0000109845 hypothetical LOC567472  
 ENSDART0000064678 lefty2  
 ENSDART0000104762 si:ch211-241j12.1; hypothetical protein LOC100149864  
 ENSDART0000038401 hypothetical protein LOC553515  
 ENSDART0000074100 zgc:56005  
 ENSDART0000056305 frizzled homolog 8b  
 ENSDART0000063107 cytochrome P450, family 2, subfamily J, polypeptide 24  
 ENSDART0000100667 nuclear oncoprotein skia  
 ENSDART0000114674 zgc:101867  
 ENSDART0000076974 glutamine-fructose-6-phosphate transaminase 2  
 ENSDART0000074455 ADP-ribosylation factor-like 13A  
 ENSDART0000032739 sprouty homolog 1 (Drosophila)  
 ENSDART0000025689 zgc:77799  
 ENSDART0000081309 cytochrome P450, family 27, subfamily C, polypeptide 1  
 ENSDART0000059654 hypothetical LOC558777  
 ENSDART0000023797 alkaline ceramidase 1  
 ENSDART0000056523 hexokinase domain containing 1  
 ENSDART0000052061 calponin 2  
 ENSDART000001102 si:ch211-214d15.1  
 ENSDART0000077189 immediate early response 5-like  
 ENSDART0000039280 similar to frizzled homolog 7b; frizzled homolog 7b; frizzled homolog 7a  
 ENSDART0000043312 splicing factor, arginine/serine-rich 5a  
 ENSDART0000027304 si:dkey-14d8.5  
 ENSDART0000063775 zgc:153665  
 ENSDART0000023519 ENSDARG0000003313  
 ENSDART0000059188 Kruppel-like factor 2b  
 ENSDART0000025451 zgc:55456  
 ENSDART0000016602 cadherin-like 23  
 ENSDART0000115255 ENSDARG0000079742  
 ENSDART0000074450 zgc:101052  
 ENSDART0000079514 ENSDARG0000044029  
 ENSDART0000061477 ENSDARG0000041947  
 ENSDART0000056987 MARCKS-like 1  
 ENSDART0000054877 fibroblast growth factor 24  
 ENSDART0000106652 ENSDARG00000071866  
 ENSDART0000097515 ENSDARG0000067706  
 ENSDART0000084859 similar to RAB GTPase activating protein 1-like  
 ENSDART0000066269 ADP-ribosylation factor-like 4D  
 ENSDART0000052441 catenin (cadherin-associated protein), alpha  
 ENSDART0000113431 ENSDARG0000069964  
 ENSDART0000063395 glycerol-3-phosphate dehydrogenase 1b  
 ENSDART0000051553 zinc finger protein 703  
 ENSDART0000112349 phospholipase C, delta 1a  
 ENSDART0000037891 dipeptidyl-peptidase 7  
 ENSDART0000100482 bone morphogenetic protein 2b  
 ENSDART0000016307 hairy-related 1  
 ENSDART0000087454 grainyhead-like 1 (Drosophila)  
 ENSDART0000080389 ENSDARG0000057664  
 ENSDART0000114539 zgc:174904; similar to C-type lectin domain family 4 member E (C-type lectin superfamily member 9) (Macrophage-inducible C-type lectin)  
 ENSDART000002954 similar to immunoglobulin superfamily, member 3; zgc:91849  
 ENSDART0000089117 hypothetical protein LOC10007078  
 ENSDART0000017695 forkhead box D3  
 ENSDART0000053264 apelin receptor b  
 ENSDART0000067478 zgc:136656  
 ENSDART0000080693 LIM homeobox 5  
 ENSDART0000082922 zgc:158868  
 ENSDART0000007732 calpain 9  
 ENSDART0000058831 trophoblast glycoprotein-like  
 ENSDART0000032827 zgc:162964  
 ENSDART0000012686 zgc:101000  
 ENSDART0000083515 novel protein similar to murine PDZ domain containing 3 (Pdzk3)  
 ENSDART0000091076 ENSDARG0000062750  
 ENSDART0000004233 aspartoacylase (aminocyclase) 3.2  
 ENSDART0000066789 STAR3 N-terminal like  
 ENSDART0000032212 similar to Tyrosine-protein kinase FRK (FYN-related kinase) (Nuclear tyrosine protein kinase RAK)  
 ENSDART0000101851 prickle homolog 1 (Drosophila) b  
 ENSDART0000064137 similar to novel 7 transmembrane receptor (metabotropic glutamate family) protein  
 ENSDART0000052385 tryptophan hydroxylase 1b  
 ENSDART0000090624 zgc:153784  
 ENSDART0000108802 zgc:110712

ENSDART00000066259 zgc:165664  
 ENSDART00000002842 zgc:110692  
 ENSDART00000104197 zgc:192870; zgc:91876  
 ENSDART00000057268 similar to cDNA sequence AK220484  
 ENSDART00000098010 prostaglandin E receptor 4 (subtype EP4) b  
 ENSDART00000110403 novel protein similar to H.sapiens solute carrier family 7 (cationic amino acid transporter, y+ system), member 5  
 ENSDART00000076082 ENSDARG00000053973  
 ENSDART00000049863 si:ch211-238e6.5  
 ENSDART00000035967 bromodomain-containing 2a  
 ENSDART00000109928 similar to ATP-binding cassette, sub-family C, member 1  
 ENSDART00000101061 ENSDARG00000069434  
 ENSDART00000058643 zinc finger protein 750  
 ENSDART00000026448 si:ch211-157f15.1  
 ENSDART0000009500 allograft inflammatory factor 1-like  
 ENSDART00000103440 si:dkey-97m3.1  
 ENSDART00000098791 zgc:112012  
 ENSDART00000075785 zgc:110333; zgc:173444  
 ENSDART00000004361 similar to kruppel-like factor 5  
 ENSDART00000101204 neurolin-like cell adhesion molecule  
 ENSDART00000053463 monoglyceride lipase  
 ENSDART00000085724 ENSDARG00000060675  
 ENSDART00000101414 heterogeneous nuclear ribonucleoprotein D  
 ENSDART00000090984 similar to C25F9.2  
 ENSDART00000091519 similar to CAB2 protein; zgc:171485  
 ENSDART00000081215 keratin 8  
 ENSDART00000039204 tripartite motif-containing 25-like  
 ENSDART00000110267 zgc:153454; hypothetical protein LOC100148523; similar to mediator complex subunit 13  
 ENSDART00000103981 similar to chemokine (C-X-C motif) receptor 3.1  
 ENSDART00000044294 furry homolog b (Drosophila)  
 ENSDART0000010526 FAT tumor suppressor homolog 1  
 ENSDART00000077304 patched 1  
 ENSDART00000114372 zinc finger-like gene 1; similar to zinc finger-like gene 1  
 ENSDART00000114381 zinc finger-like gene 1; similar to zinc finger-like gene 1  
 ENSDART00000114863 zinc finger-like gene 1; similar to zinc finger-like gene 1  
 ENSDART00000057553 si:dkey-2411.8  
 ENSDART00000041852 wingless-type MMTV integration site family, member 5b  
 ENSDART00000109774 zgc:86915; zgc:171947; zgc:171945; zgc:101673; zgc:153597  
 ENSDART00000028610 ELAV (embryonic lethal, abnormal vision, Drosophila)-like 3 (Hu antigen C)  
 ENSDART00000078305 si:ch73-38p6.1  
 ENSDART0000018423 tyrosine 3-monooxygenase/tryptophan 5-monooxygenase activation protein, theta polypeptide b  
 ENSDART00000078425 even-skipped-like1  
 ENSDART00000074125 apelin receptor a  
 ENSDART00000114915 apelin receptor a  
 ENSDART00000106313 zgc:162212  
 ENSDART00000088490 zgc:153175  
 ENSDART00000098419 ENSDARG00000040503  
 ENSDART00000048164 phosphoribosylaminoimidazole carboxylase, phosphoribosylaminoimidazole succinocarboxamide synthetase  
 ENSDART00000085325 ENSDARG00000060507  
 ENSDART00000040810 ADP-ribosylation factor-like 4, like  
 ENSDART00000097879 hypothetical LOC560020  
 ENSDART00000022620 zgc:136817  
 ENSDART00000073930 wu:fc10f03; notch homolog 3  
 ENSDART00000087844 estrogen receptor 1; A kinase (PRKA) anchor protein (gravin) 12  
 ENSDART00000110883 estrogen receptor 1; A kinase (PRKA) anchor protein (gravin) 12  
 ENSDART0000011749 spinster homolog 2 (Drosophila)  
 ENSDART00000046355 similar to protor-2  
 ENSDART00000105761 zic family member 3 heterotaxy 1 (odd-paired homolog, Drosophila)  
 ENSDART0000018010 ENSDARG00000079431  
 ENSDART00000046423 ADP-ribosylation factor-like 4Cb  
 ENSDART00000103265 zgc:158773  
 ENSDART00000021664 claudin b  
 ENSDART00000075519 aldehyde dehydrogenase 1 family, member A2  
 ENSDART00000100942 zgc:158225  
 ENSDART00000076915 similar to organic cation transporter like 3  
 ENSDART00000056655 Kruppel-like factor 4  
 ENSDART00000052649 similar to SH3 domain binding protein CR16  
 ENSDART00000067537 ELOVL family member 6, elongation of long chain fatty acids like  
 ENSDART00000079692 nodal-related 1  
 ENSDART00000082349 transcription factor AP-2 alpha  
 ENSDART00000058215 similar to brachyury transcription factor  
 ENSDART00000104496 dual specificity phosphatase 6  
 ENSDART00000045397 syntaxin 11b.1  
 ENSDART0000007356 no tail a  
 ENSDART00000089015 similar to Zinc finger and BTB domain containing protein 7 (Leukemia/lymphoma related factor) (Factor that binds to inducer of short transcripts protein 1)  
 ENSDART00000020412 polycystic kidney disease 2  
 ENSDART00000060597 SRY-box containing gene 32  
 ENSDART00000067534 Hrc protein  
 ENSDART00000097880 RasGEF domain family, member 1Ba  
 ENSDART00000078703 adducin 3 (gamma) b  
 ENSDART00000077352 similar to PLAC8-like protein 1  
 ENSDART00000055834 phosphatase, orphan 1  
 ENSDART00000091376 ENSDARG00000062913  
 ENSDART00000029555 zgc:92512  
 ENSDART00000104358 similar to AT-rich interactive domain-containing protein 3A (ARID domain-containing protein 3A) (Dead ringer-like protein 1) (Bright) (E2F-binding protein 1);  
 ENSDART00000101574 ephrin A5a  
 ENSDART00000103234 GDP-mannose 4,6-dehydratase  
 ENSDART00000047616 similar to Membrane metallo-endopeptidase-like 1 (Membrane metallo-endopeptidase-like 2) (Nepriylsin-2) (Nepriylsin II) (NL2) (NEPII) (NEP2(m))  
 ENSDART00000020270 odd-skipped related 1 (Drosophila)  
 ENSDART00000099320 zgc:103654  
 ENSDART00000055995 S-antigen; retina and pineal gland (arrestin)  
 ENSDART00000053106 sphingosine-1-phosphate receptor 2  
 ENSDART00000046174 zgc:100942  
 ENSDART00000112189 similar to GTPase, IMAP family member 7  
 ENSDART00000005641 LIM homeobox 1a  
 ENSDART00000104681 IQ motif containing with AAA domain 1; similar to IQ motif containing with AAA domain

**Supplemental Table S3: Genes in both periderm-enriched and dnIrf6-enriched profiles**

| ENSEMBL_TRANSCRIPT_ID | Name                                                                                                           |
|-----------------------|----------------------------------------------------------------------------------------------------------------|
| ENSDART00000001102    | si:ch211-214d15.1                                                                                              |
| ENSDART00000002842    | zgc:110692                                                                                                     |
| ENSDART00000004964    | NAD(P)H dehydrogenase, quinone 1                                                                               |
| ENSDART00000007732    | calpain 9                                                                                                      |
| ENSDART00000009500    | allograft inflammatory factor 1-like                                                                           |
| ENSDART00000011471    | zgc:101565                                                                                                     |
| ENSDART00000012284    | zgc:63546; cytochrome P450 CYP2AA3v1                                                                           |
| ENSDART00000013480    | elongation of very long chain fatty acids (FEN1/Elo2, SUR4/Elo3, yeast)-like 1a                                |
| ENSDART00000013798    | nuclear factor of kappa light polypeptide gene enhancer in B-cells inhibitor, alpha 6                          |
| ENSDART00000013972    | similar to absent in melanoma 1-like                                                                           |
| ENSDART00000016894    | similar to endothelial differentiation, lysophosphatidic acid G-protein-coupled receptor 7                     |
| ENSDART00000017402    | zgc:92046                                                                                                      |
| ENSDART00000017456    | ventral expressed homeobox                                                                                     |
| ENSDART00000020750    | keratin 18                                                                                                     |
| ENSDART00000021159    | LIM homeobox 1b                                                                                                |
| ENSDART00000023797    | alkaline ceramidase 1                                                                                          |
| ENSDART00000023985    | zgc:153952                                                                                                     |
| ENSDART00000025153    | hypothetical protein LOC100151105; GATA-binding protein 3                                                      |
| ENSDART00000025451    | zgc:55456                                                                                                      |
| ENSDART00000026448    | si:ch211-157f15.1                                                                                              |
| ENSDART00000027701    | type I cytokeratin; zgc:109868; si:dkeyp-113d7.4                                                               |
| ENSDART00000032212    | similar to Tyrosine-protein kinase FRK (FYN-related kinase) (Nuclear tyrosine protein kinase RAK)              |
| ENSDART00000032827    | zgc:162964                                                                                                     |
| ENSDART00000036597    | pleckstrin homology domain containing, family F (with FYVE domain) member 1                                    |
| ENSDART00000038401    | hypothetical protein LOC553515                                                                                 |
| ENSDART00000039204    | tripartite motif-containing 25-like                                                                            |
| ENSDART00000045397    | syntaxin 11b.1                                                                                                 |
| ENSDART00000046174    | zgc:100942                                                                                                     |
| ENSDART00000052521    | nuclear factor of activated T-cells, cytoplasmic, calcineurin-dependent 1                                      |
| ENSDART00000052570    | paired-like homeodomain transcription factor 2                                                                 |
| ENSDART00000052649    | similar to SH3 domain binding protein CR16                                                                     |
| ENSDART00000053463    | monoglyceride lipase                                                                                           |
| ENSDART00000054877    | fibroblast growth factor 24                                                                                    |
| ENSDART00000055241    | periplakin                                                                                                     |
| ENSDART00000056519    | similar to Probable G-protein coupled receptor 160                                                             |
| ENSDART00000057553    | si:dkey-2411.8                                                                                                 |
| ENSDART00000057986    | tissue specific transplantation antigen P35B; zgc:100864                                                       |
| ENSDART00000058643    | zinc finger protein 750                                                                                        |
| ENSDART00000059188    | Kruppel-like factor 2b                                                                                         |
| ENSDART00000060861    | forkhead box P2                                                                                                |
| ENSDART00000061477    | ENSDARG00000041947                                                                                             |
| ENSDART00000063320    | claudin e                                                                                                      |
| ENSDART00000063325    | hypothetical LOC791933; claudin f                                                                              |
| ENSDART00000063775    | zgc:153665                                                                                                     |
| ENSDART00000065819    | chloride intracellular channel a                                                                               |
| ENSDART00000066789    | STAR3 N-terminal like                                                                                          |
| ENSDART00000066946    | transmembrane and coiled-coil domain family 3                                                                  |
| ENSDART00000067534    | Hrc protein                                                                                                    |
| ENSDART00000067537    | ELOVL family member 6, elongation of long chain fatty acids like                                               |
| ENSDART00000075785    | zgc:110333; zgc:173444                                                                                         |
| ENSDART00000077111    | zgc:100900                                                                                                     |
| ENSDART00000077352    | similar to PLAC8-like protein 1                                                                                |
| ENSDART00000078983    | coiled-coil domain containing 125; similar to Kenae                                                            |
| ENSDART00000080693    | LIM homeobox 5                                                                                                 |
| ENSDART00000081327    | keratin 5                                                                                                      |
| ENSDART00000081604    | adiponectin receptor 2                                                                                         |
| ENSDART00000082000    | ENSDARG00000059002                                                                                             |
| ENSDART00000082425    | GATA-binding protein 2a                                                                                        |
| ENSDART00000082453    | cadherin, EGF LAG seven-pass G-type receptor 2                                                                 |
| ENSDART00000082922    | zgc:158868                                                                                                     |
| ENSDART00000084859    | similar to RAB GTPase activating protein 1-like                                                                |
| ENSDART00000085325    | ENSDARG00000060507                                                                                             |
| ENSDART00000085724    | ENSDARG00000060675                                                                                             |
| ENSDART00000087454    | grainyhead-like 1 (Drosophila)                                                                                 |
| ENSDART00000089015    | similar to Zinc finger and BTB domain containing protein 7 (Leukemia/lymphoma related factor)                  |
| ENSDART00000090727    | ENSDARG00000062632                                                                                             |
| ENSDART00000097515    | ENSDARG00000067706                                                                                             |
| ENSDART00000098246    | si:dkey-7b17.2                                                                                                 |
| ENSDART00000099074    | similar to cytochrome P450                                                                                     |
| ENSDART00000099320    | zgc:103654                                                                                                     |
| ENSDART00000099870    | cytochrome P450, family 1, subfamily B, polypeptide 1                                                          |
| ENSDART00000100311    | IKAROS family zinc finger 2                                                                                    |
| ENSDART00000100818    | hypothetical LOC798921                                                                                         |
| ENSDART00000101061    | ENSDARG00000069434                                                                                             |
| ENSDART00000101556    | ArfGAP with SH3 domain, ankyrin repeat and PH domain 2b                                                        |
| ENSDART00000103234    | GDP-mannose 4,6-dehydratase                                                                                    |
| ENSDART00000103265    | zgc:158773                                                                                                     |
| ENSDART00000104319    | similar to inositol 1,4,5-trisphosphate 3-kinase A; inositol 1,4,5-trisphosphate 3-kinase A                    |
| ENSDART00000105004    | keratin 15; type I cytokeratin, enveloping layer, like; si:dkeyp-113d7.7; type I cytokeratin, enveloping layer |
| ENSDART00000105036    | keratin 15; type I cytokeratin, enveloping layer, like; si:dkeyp-113d7.7; type I cytokeratin, enveloping layer |
| ENSDART00000105048    | similar to zinc finger protein 629                                                                             |
| ENSDART00000105694    | zgc:64213                                                                                                      |
| ENSDART00000108802    | zgc:110712                                                                                                     |
| ENSDART00000109423    | hydroxysteroid (17-beta) dehydrogenase 12a                                                                     |

Intersection of periderm-enriched and dnIrf6-inhibited profiles

|                    |                                                                        |
|--------------------|------------------------------------------------------------------------|
| ENSDART00000109774 | zgc:86915; zgc:171947; zgc:171945; zgc:101673; zgc:153597              |
| ENSDART00000110550 | breast cancer anti-estrogen resistance 3                               |
| ENSDART00000112287 | wu:fc51b03                                                             |
| ENSDART00000112349 | phospholipase C, delta 1a                                              |
| ENSDART00000113801 | zgc:193505                                                             |
| ENSDART00000113993 | ENSDARG00000078072                                                     |
| ENSDART00000114092 | novel rhamnose binding lectin; si:dkeyp-98a7.5; hypothetical LOC564145 |
