# Supplementary material
Source: PubMed Central journal article supplement (PMC3541433)

Figure S1

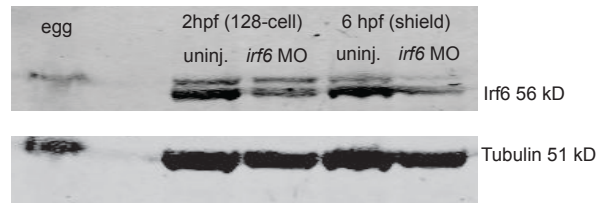

Figure S2

A

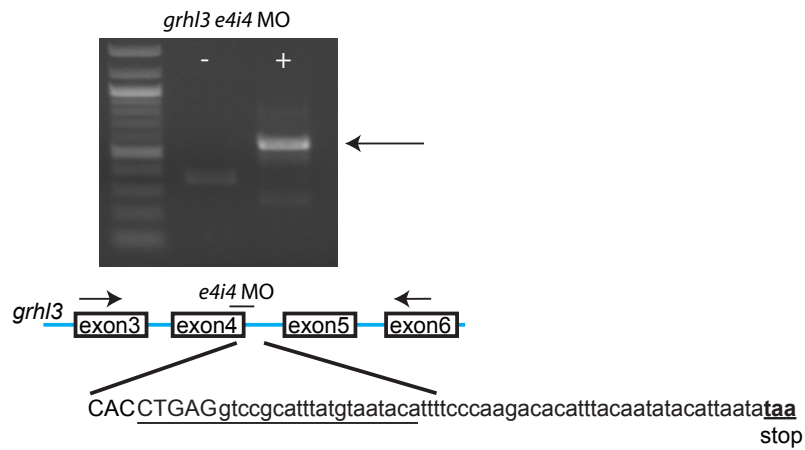

B

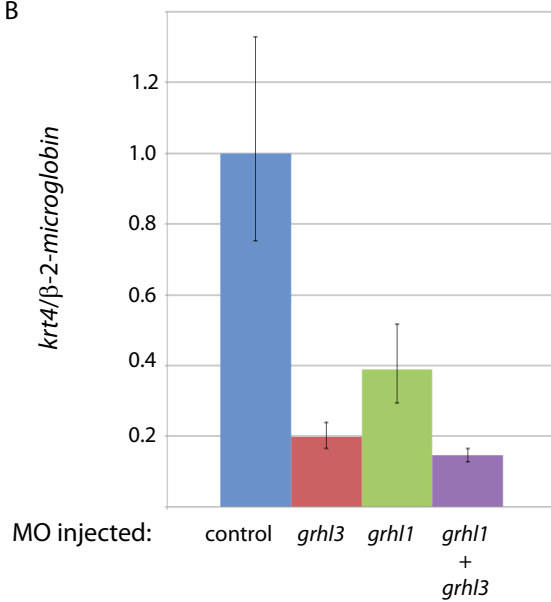

Supplement: NIHMS393605-supplement-3.pdf [file NIHMS393605-supplement-3.pdf]
